# Supplementary material for: Risk factors of non-specific neck pain and low back pain in computer-using office workers in China: a cross-sectional study
Source: PubMed Central journal article supplement — BMJ Open. 2017 Apr 11;7(4):e014914. doi: 10.1136/bmjopen-2016-014914 (PMC5594207; doi:10.1136/bmjopen-2016-014914), 2017-04-11
Supplement: bmjopen-2016-014914.draft_revisions.pdf [file bmjopen-2016-014914.draft_revisions.pdf]

# BMJ Open

## Risk factors of non-specific neck pain and low back pain in computer-using workers

|                                 |                                                                                                         |
|---------------------------------|---------------------------------------------------------------------------------------------------------|
| Journal:                        | <i>BMJ Open</i>                                                                                         |
| Manuscript ID                   | bmjopen-2016-014914                                                                                     |
| Article Type:                   | Research                                                                                                |
| Date Submitted by the Author:   | 28-Oct-2016                                                                                             |
| Complete List of Authors:       | Ye, Sunyue<br>Jing, Qinglei<br>Wei, Chen<br>Lu, Jie                                                     |
| <b>Primary Subject Heading</b>: | Occupational and environmental medicine                                                                 |
| Secondary Subject Heading:      | Public health, Epidemiology                                                                             |
| Keywords:                       | Low back disorder, Computer use, White-collar worker, Musculoskeletal pain, Self-reported questionnaire |
|                                 |                                                                                                         |

SCHOLARONE™  
Manuscripts

Peer review only

# Risk factors of non-specific neck pain and low back pain in computer-using workers

Sunyue Ye<sup>1,2\*</sup>, Qinglei Jing<sup>2</sup>, Chen Wei<sup>1,3</sup>, Jie Lu<sup>2</sup>

1. Chronic Disease Research Institute, Zhejiang University School of Public Health, Hangzhou, China, 310058.

2. Physical Activity and Health Research Institute, Zhejiang Financial College, Hangzhou, China, 310018.

3. Stanford Prevention Research Center, School of Medicine, Stanford University, CA, Unite States, 94305.

## \* Corresponding Author:

Sunyue Ye, PhD

Chronic Disease Research Institute, and Department of Nutrition and Food Hygiene  
Zhejiang University School of Public Health,  
866 Yu-hang-tang Road, Hangzhou, Zhejiang 310058 China.

Tel: (+86) 571-8820-8591 or (+86) 13588115849

E-mail: [yesunyue@zju.edu.cn](mailto:yesunyue@zju.edu.cn)

## Abstract

**Objectives:** Several studies have found that inappropriate workstation associates with musculoskeletal disorders. Herein, the cross-sectional study aimed to identify the risk factors of non-specific neck pain (NP) and low back pain (LBP) among computer-using workers. **Design:** Observational, retrospective analysis of cross-sectional sample. **Setting:** This study has surveyed 15 companies in Zhejiang province, China. **Participants:** After excluding participants with missing variables, 417 office workers including 163 men and 254 women were analyzed. **Outcome measures:** Demographic information was collected by self-report. The standard Northwick Park Neck Pain Questionnaire and Oswestry Low Back Pain Disability Index, along with other relevant questions, were used to assess the potential occupational factors and perceived levels of pain. Multinomial logistic regression analysis adjusted for age, sex, body mass index, education, marriage, and neck/low back injury was performed. **Results:** Compared with low-level NP, the computer location (monitor not in front) was associated with odds ratios (ORs) of 2.590 and 2.939 for medium- and high-level NP, respectively. For LBP, high-level pain was associated with an OR of 3.215 compared with low-level pain in females. Significant associations were also observed between the office temperature (OR: 5.352 for high vs. low) and LBP, and between office work  $\geq 5$  years (OR: 2.702 for medium vs. low) and NP in female office workers. **Conclusions:** Not having the computer monitor located in front was an important risk factor of NP and LBP in female computer-using workers. This information not only enables the development of potential preventive strategies but also provides new insights for designing appropriate workstations.

**Strengths and limitations of this study:**

- This is the first study on the associations of computer monitor horizontal location with NP and LBP in Chinese computer users.
- Most participants are young and recruited via the identification of alumni.
- This study has not explored the relationships between exact angle of the computer monitor location and NP/LBP based on objectively measurement.

**Keywords:** Low back disorder; Computer use; Musculoskeletal pain; White-collar worker; Self-reported questionnaire.

## Introduction

Non-specific low back pain (LBP) and neck pain (NP) are highly common musculoskeletal disorders and the leading causes of disability worldwide[1]. It has been well established that LBP and NP are not only risk factors of severe spine problems or functional disability, but they are also associated with decreased quality of life and productivity of workers[2]. Although NP and LBP are musculoskeletal conditions affecting different body parts, they generally have similar symptoms, hazards, and etiology[3].

The risk factors of NP or LBP are commonly multidimensional, including muscular, skeletal, and nervous system-related factors; can be both modifiable and non-modifiable; and can be divided into individual and occupational factors. Previous studies have shown that individual factors such as sex, age, history of neck/low back injury, and psychological factors (e.g., mental stress, anxiety, depression, and social support) are related to NP and/or LBP[4 5]. In addition, limited studies have also indicated that occupational factors, including prolonged sedentary or office work hours, high work load/demands, and inappropriate workstation design, are associated with NP and/or LBP[6-8].

Sedentary or office workers in schools, hospitals, or the military have been observed to have high incidences and prevalence of NP and LBP[9-11]. This might be caused by prolonged sitting time and specific body postures, such as inappropriate neck or low back flexion or rotation, and other workplace environmental factors[12]. However, the current literature on modifiable determinants of NP/LBP among workers in modern workplace environments, where intensive computer use is common, is insufficient[13]. Thus, the present study aimed to explore the associations of occupational risk factors with NP and LBP in computer-using office workers.

## Methods

### *Participants*

The cross-sectional study was conducted in 15 financial organizations, Zhejiang, China. A total of 425 office workers were recruited and investigated based on cluster sampling from September to December 2015, via the identification of alumni of Zhejiang Financial College (ZFC). All subjects signed informed consent before participating in the study. After excluding subjects with individual and/or occupational information missing (n=8), 417 subjects were included in the final analysis. The study was granted approval by ZFC's Institutional Review Board.

### *Data collection and variables definition*

Data were collected by mailed questionnaires, which included the Northwick Park Neck Pain Questionnaire (NPQ)[14] and the Oswestry Low Back Pain Disability Index (ODI)[15] to measure NP and LBP, respectively. Individual and demographic information, including sex, age, height, weight, education, marriage status, and history of related injuries, was collected by a validated questionnaire. Based on previous literature and a pre-survey, the potential occupational risk factors (e.g., office work years, office temperature, location of the computer monitor, and duration of computer use per day) were determined by the research group. Subjects with non-specific NP or LBP were defined by a self-rated value of the NPQ or ODI of > 0. Body mass index (BMI) was calculated as the weight (kg) divided by the squared height (m<sup>2</sup>). All data were double-entered and checked with Epidata 3.1.

### *Statistical analysis*

First, we classified the values of NPQ and ODI into tertiles (low: ODI<0.19 NPQ<0.25, medium: 0.19≤ODI<0.24 and 0.25≤NPQ<0.34, and high: ODI≥0.24 and NPQ≥0.34). To test the differences in the categorical variables according to the NPQ

1  
2  
3 or ODI results, the Chi-square test or Fisher's exact test was used if the cell number  
4 was <5, while ANOVA was used for continuous variables. Independent associations  
5 of occupational variables with NPQ or ODI and their interactions were analyzed using  
6 a multinomial logistic regression model stratified by sex, because significant  
7 interactions between sex and occupational variables were observed. The results are  
8 presented as the odds ratios (ORs) with 95% confidence intervals (CIs). A sensitivity  
9 analysis was conducted by including subjects with missing variables. All statistical  
10 analyses were conducted with IBM SPSS 20.0 (IBM Corporation, New York, USA).  
11 Statistical significance was defined as  $p < 0.05$ .  
12  
13  
14  
15  
16  
17  
18  
19  
20  
21  
22

## 23 Results

24  
25 The characteristics of the study subjects are shown in Table 1. The mean age  
26 was 29.12 ( $\pm 6.79$ ) years. The prevalence rates of NP and LBP were 86.33% and  
27 75.54%, respectively; subjects with LBP combined with NP accounted for 71.46%.  
28 The differences in sex, marriage status, history of neck injury, and office temperature  
29 among the NPQ tertiles were significant ( $p < 0.05$ ). Similarly, the differences in marital  
30 status, history of low back injury, office temperature, and location of the computer  
31 monitor significantly differed among the ODI tertiles ( $p < 0.05$ ).  
32  
33  
34  
35  
36  
37  
38  
39  
40  
41

42 Table 2 shows the results of the multinomial logistic regression of individual  
43 and occupational factors related to NP. In the total subjects, compared with the low  
44 NPQ tertile, office work  $\geq 5$  years (medium tertile; OR: 2.006, 95% CI: 1.038-3.877),  
45 male sex (high tertile; OR: 0.355, 95% CI: 0.197-0.638), history of neck injury (high  
46 tertile; OR: 9.612, 95% CI: 1.056-87.517), and computer monitor not located in front  
47 (i.e. on the right or left side of the operator) (high tertile; OR: 1.994, 95% CI:  
48 1.169-3.401) were significantly associated with the risk of NP after adjusting for age,  
49  
50  
51  
52  
53  
54  
55  
56  
57  
58  
59  
60

1  
2  
3  
4 BMI, sex, education, marriage status, and history of neck injury. Among the male  
5  
6 participants, no significant associations were observed between occupational factors  
7  
8 and the NPQ tertiles. In females, having the computer monitor not located in front (vs.  
9  
10 in front) was a significant risk factor for the medium (OR: 2.582, 95% CI:  
11  
12 1.254-5.318) and high (OR: 3.052, 95% CI: 1.469-6.344) NPQ tertiles, as compared  
13  
14 with the low NPQ tertile. Work  $\geq$  5 years (vs.  $<$  5 years) was a significant risk factor  
15  
16 for the medium (OR: 2.702, 95% CI: 1.051-6.943) but not high NPQ tertile ( $p>0.05$ ).  
17  
18  
19

20  
21 The results of the multinomial logistic regression analysis for LBP are  
22  
23 presented in Table 3. In the total subjects, compared with the low ODI tertile, married  
24  
25 individuals (high; OR: 2.078, 95% CI: 1.058-4.081), history of low back injury (high;  
26  
27 OR: 4.358, 95% CI: 1.653-11.705), cold office temperature (medium tertile; OR:  
28  
29 2.429, 95% CI: 1.019-5.791 and high tertile; OR: 4.173, 95% CI: 1.819-9.573), and  
30  
31 the computer monitor not located in front (high; OR: 2.048, 95% CI: 1.219-3.442)  
32  
33 were significant risk factors for LBP after adjusting for age, BMI, sex, education,  
34  
35 marriage status, and history of low back injury. In males, age (medium tertile; OR:  
36  
37 0.914, 95% CI: 0.837-0.998), history of low back injury (medium tertile; OR: 7.240,  
38  
39 95% CI: 1.304-40.204 and high tertile; 5.775, 95% CI: 1.074-31.065), and education  
40  
41 (high tertile; OR: 0.385, 95% CI: 0.159-0.928) were significant risk factors for LBP,  
42  
43 while no significant associations were observed between occupational factors and the  
44  
45 ODI tertiles. In females, married individuals (medium tertile; OR: 3.310, 95% CI:  
46  
47 1.343-8.158 and high tertile; OR: 3.501, 95% CI: 1.392-8.805), low back injury (high  
48  
49 tertile; OR: 4.205, 95% CI: 1.175-15.042), cold office temperature (high tertile; OR:  
50  
51  
52  
53  
54  
55  
56  
57  
58  
59  
60



1  
2  
3  
4 5.352, 95% CI: 1.787-16.028), and not having the computer monitor in front (high  
5  
6  
7  
8  
9  
10  
11  
12  
13  
14  
15  
16  
17  
18  
19  
20  
21  
22  
23  
24  
25  
26  
27  
28  
29  
30  
31  
32  
33  
34  
35  
36  
37  
38  
39  
40  
41  
42  
43  
44  
45  
46  
47  
48  
49  
50  
51  
52  
53  
54  
55  
56  
57  
58  
59  
60

tertile; OR: 3.215, 95% CI: 1.581-6.539) were significant risk factor of LBP as compared with the low ODI tertile.

The results showed no significant differences between included and excluded the participants with missing variables.

## Discussion

In the present study, having the computer monitor not located in front (i.e. on the right or left side), cold office temperature, and work  $\geq 5$  years were significantly associated with non-specific NP and/or LBP after controlling for age, BMI, sex, education, marital status, and history of neck/low back injury. This result has significance for developing prevention or intervention strategies against non-specific NP and LBP in computer-using office workers.

Previous researches on the associations of occupational factors among intensive computer users with non-specific NP/LBP are scarce[6]. Limited studies have indicated that psychosocial stress, long work hours, poor social support, and neck/low back flexion/bending in the workplace might be occupational risk factors[7 8 12]. Paksaichol et al. (2015) indicated that monitor height (vertical level) might be an indirect risk factor associated with neck pain[16]. However, to our knowledge, few studies have indicated that the location of the computer monitor (lateral level) is an important risk factor of non-specific NP/LBP. Prolonged and repeated body trunk over-rotation/flexion might cause non-specific NP/LBP by damaging the musculoskeletal system of neck or low back[17 18], as the individual needs to turn around and face the computer monitor if it is not located directly in front. Especially, many workstations in various organizations and companies are multifaceted, requiring the office workers or operators to rotate their body/trunk continuously while working.

1  
2  
3 This result might have crucial implications and provide a direction of practice for  
4  
5 future workstation designs in related industries.  
6

7  
8 In addition, it has been well established that cold stimulation is a risk factor of  
9  
10 musculoskeletal pain[19-21]. Our result also found that there was an association  
11  
12 between cold office temperature and non-specific LBP, providing further evidence for  
13  
14 this possible causal relationship, although there might be reciprocal causation between  
15  
16 these two variables, with individuals with LBP potentially being much more  
17  
18 susceptible to cold environments (lower office temperature) or experiencing enhanced  
19  
20 perceived pain via their sensory nerves[22]. On the other hand, it can be speculated  
21  
22 that a warm office temperature might be associated with less non-specific LBP among  
23  
24 intensive computer users or sedentary workers.  
25  
26

27  
28 In this study, we also found that longer work years and individual factors,  
29  
30 including injuries of the neck/low back, married individuals, and female sex, were  
31  
32 associated with non-specific NP/LBP. This result is consistent with the relevant  
33  
34 previous studies[6-8]. Women are known to have a higher prevalence of NP/LBP and  
35  
36 to be more susceptible to environmental risk factors than men. This might be due to  
37  
38 their lower bone mineral density and specific anatomical structure[23 24]. The reason  
39  
40 why BMI, education, and computer-using time were not significantly associated with  
41  
42 NP/LBP may be because of the narrow distribution of these variables in our limited  
43  
44 study subjects. Our participants were younger (85% of the subjects were younger than  
45  
46 35 years) than the general industrial workers in China, and it is difficult to determine  
47  
48 whether there is statistical significance based on variables with such a narrow  
49  
50 distribution.  
51  
52

53  
54 There were some limitations in this study that need to be acknowledged. Due  
55  
56 to the cross-sectional design of the study, we were unable to detect the potential  
57  
58  
59  
60

1  
2  
3 causality. Meanwhile, most participants were young and comprised intensive  
4  
5 computer users and financial office workers. Thus, care must be taken when  
6  
7 generalizing our results to other populations. Lastly, the use of a self-report  
8  
9 questionnaire might generate systematical bias. Although physical factors can be  
10  
11 assessed objectively, most previous studies used self-reported questionnaires for  
12  
13 measuring non-specific pain and individual or environmental factors[5 7 8 25].  
14  
15 Nevertheless, in this study, we tested and verified the significance of occupational and  
16  
17 environmental risk factors, including the location of the computer monitor and the  
18  
19 office temperature, for non-specific NP/LBP. These findings are important for modern  
20  
21 office workers, especially for those who are intensive computer users.  
22  
23  
24

## 25 26 **Conclusions**

27  
28 Location of the computer monitor not in front (i.e. on the left or right side) of  
29  
30 the operator is a modifiable occupational risk factor of non-specific NP and LBP.  
31  
32 Additionally, a history of neck/low back injury, longer office work years, female sex,  
33  
34 and married individuals were also important occupational or individual determinants  
35  
36 that correlate with NP/LBP. Further prospective studies using objective measurements  
37  
38 of work-related body posture and repetitiveness are required to confirm our findings.  
39  
40  
41  
42

43  
44 **Acknowledgements:** We would like to thank Jingxia Fan, Lengyu Guo, Jinghao  
45  
46 Zhang, Jiayi Zhou, Zhuoyuan Zhao, Ze Yu, Binbin Dong, Haiou Miao, Yanbo Cen,  
47  
48 Luna Xu, Yan Quan, Tingting Wu, Jie Chen, Lina Zhang, and Sheng Chen for data  
49  
50 collection and Editage [www.editage.cn] for English language editing.  
51  
52  
53  
54

55  
56 **Contributorship statement:** Sunyue Ye constructed the questionnaire,  
57  
58 performed the final statistical analyses and prepared the first version of manuscript.  
59  
60

1  
2  
3 Qinglei Jing and Jie Lu collected the data. Chen Wei critically reviewed, commented  
4  
5 and revised the manuscript. All authors were responsible and approved the final  
6  
7 manuscript.  
8  
9

10  
11  
12 **Competing interests:** There are no competing interests.  
13

14  
15  
16  
17 **Funding:** This study was supported by Zhejiang Financial Education Foundation  
18  
19 (grant 2014-19).  
20  
21

22  
23  
24 **Data sharing statement:** No additional unpublished data are available.  
25  
26

27  
28  
29 **References:**  
30

- 31  
32  
33 1. Vassilaki M, Hurwitz EL. Insights in public health: perspectives on pain in the low  
34  
35 back and neck: global burden, epidemiology, and management. *Hawaii J Med*  
36  
37 *Public Health* 2014;**73**(4):122-6.  
38  
39  
40 2. Matsudaira K, Kawaguchi M, Isomura T, et al. Assessment of psychosocial risk  
41  
42 factors for the development of non-specific chronic disabling low back pain in  
43  
44 Japanese workers-findings from the Japan Epidemiological Research of  
45  
46 Occupation-related Back Pain (JOB) study. *Ind Health* 2015;**53**(4):368-77.  
47  
48  
49 3. Mayer J, Kraus T, Ochsmann E. Longitudinal evidence for the association between  
50  
51 work-related physical exposures and neck and/or shoulder complaints: a  
52  
53 systematic review. *Int Arch Occup Environ Health* 2012;**85**(6):587-603.  
54  
55  
56  
57  
58  
59  
60

- 1  
2  
3  
4 4. Kindler LL, Jones KD, Perrin N, Bennett RM. Risk factors predicting the  
5  
6 development of widespread pain from chronic back or neck pain. *J Pain*  
7  
8 2010;**11**(12):1320-8.  
9
- 10  
11 5. Noormohammadpour P, Mansournia MA, Asadi-Lari M, Nourian R, Rostami M,  
12  
13 Kordi R. A Subtle Threat to Urban Populations in Developing Countries: Low  
14  
15 Back Pain and its Related Risk Factors. *Spine (Phila Pa 1976)*  
16  
17 2016;**41**(7):618-27.  
18  
19
- 20  
21 6. Paksaichol A, Janwantanakul P, Purepong N, Pensri P, van der Beek AJ. Office  
22  
23 workers' risk factors for the development of non-specific neck pain: a  
24  
25 systematic review of prospective cohort studies. *Occup Environ Med*  
26  
27 2012;**69**(9):610-8.  
28  
29
- 30  
31 7. Yang H, Hitchcock E, Haldeman S, et al. Workplace psychosocial and  
32  
33 organizational factors for neck pain in workers in the United States. *Am J Ind*  
34  
35 *Med* 2016;**59**(7):549-60.  
36  
37
- 38  
39 8. Yang H, Haldeman S, Nakata A, Choi B, Delp L, Baker D. Work-related risk  
40  
41 factors for neck pain in the US working population. *Spine (Phila Pa 1976)*  
42  
43 2015;**40**(3):184-92.  
44  
45
- 46  
47 9. Chiu TT, Lam PK. The prevalence of and risk factors for neck pain and upper limb  
48  
49 pain among secondary school teachers in Hong Kong. *J Occup Rehabil*  
50  
51 2007;**17**(1):19-32.  
52  
53  
54  
55  
56  
57  
58  
59  
60

- 1  
2  
3  
4 10. De Loose V, Burnotte F, Cagnie B, Stevens V, Van Tiggelen D. Prevalence and  
5  
6 risk factors of neck pain in military office workers. *Mil Med*  
7  
8 2008;**173**(5):474-9.  
9  
10  
11 11. Erick PN, Smith DR. Low back pain among school teachers in Botswana,  
12  
13 prevalence and risk factors. *BMC Musculoskelet Disord* 2014;**15**:359.  
14  
15  
16 12. Yue P, Liu F, Li L. Neck/shoulder pain and low back pain among school teachers  
17  
18 in China, prevalence and risk factors. *BMC Public Health* 2012;**12**:789.  
19  
20  
21 13. McLean SM, May S, Klaber-Moffett J, Sharp DM, Gardiner E. Risk factors for  
22  
23 the onset of non-specific neck pain: a systematic review. *J Epidemiol*  
24  
25 *Community Health* 2010;**64**(7):565-72.  
26  
27  
28  
29 14. Sim J, Jordan K, Lewis M, Hill J, Hay EM, Dziedzic K. Sensitivity to change and  
30  
31 internal consistency of the Northwick Park Neck Pain Questionnaire and  
32  
33 derivation of a minimal clinically important difference. *Clin J Pain*  
34  
35 2006;**22**(9):820-6.  
36  
37  
38  
39 15. Sheahan PJ, Nelson-Wong EJ, Fischer SL. A review of culturally adapted versions  
40  
41 of the Oswestry Disability Index: the adaptation process, construct validity,  
42  
43 test-retest reliability and internal consistency. *Disabil Rehabil* 2015:1-8.  
44  
45  
46 16. Paksaichol A, Lawsirirat C, Janwantanakul P. Contribution of biopsychosocial  
47  
48 risk factors to nonspecific neck pain in office workers: A path analysis model.  
49  
50 *J Occup Health* 2015;**57**(2):100-9.  
51  
52  
53  
54  
55  
56  
57  
58  
59  
60

- 1  
2  
3  
4 17. Ambusam S, Baharudin O, Roslizawati N, Leonard J. Position of document holder  
5  
6 and work related risk factors for neck pain among computer users: a narrative  
7  
8 review. *Clin Ter* 2015;**166**(6):256-61.  
9
- 10  
11 18. Hoogendoorn WE, Bongers PM, de Vet HC, et al. Flexion and rotation of the  
12  
13 trunk and lifting at work are risk factors for low back pain: results of a  
14  
15 prospective cohort study. *Spine (Phila Pa 1976)* 2000;**25**(23):3087-92.  
16  
17
- 18  
19 19. Pienimaki T, Karppinen J, Rintamaki H, et al. Prevalence of cold-related  
20  
21 musculoskeletal pain according to self-reported threshold temperature among  
22  
23 the Finnish adult population. *Eur J Pain* 2014;**18**(2):288-98.  
24  
25
- 26  
27 20. Burstrom L, Jarvholm B, Nilsson T, Wahlstrom J. Back and neck pain due to  
28  
29 working in a cold environment: a cross-sectional study of male construction  
30  
31 workers. *Int Arch Occup Environ Health* 2013;**86**(7):809-13.  
32  
33
- 34  
35 21. Dovrat E, Katz-Leurer M. Cold exposure and low back pain in store workers in  
36  
37 Israel. *Am J Ind Med* 2007;**50**(8):626-31.  
38
- 39  
40 22. Fernandes ES, Russell FA, Alawi KM, et al. Environmental cold exposure  
41  
42 increases blood flow and affects pain sensitivity in the knee joints of  
43  
44 CFA-induced arthritic mice in a TRPA1-dependent manner. *Arthritis Res Ther*  
45  
46 2016;**18**:7.  
47
- 48  
49 23. Briggs AM, Straker LM, Burnett AF, Wark JD. Chronic low back pain is  
50  
51 associated with reduced vertebral bone mineral measures in  
52  
53 community-dwelling adults. *BMC Musculoskelet Disord* 2012;**13**:49.  
54  
55  
56  
57  
58  
59  
60

- 1  
2  
3  
4 24. Hiz O, Ediz L, Ercan S, Arslan M, Avcu S, Tekeoglu I. The Relationship Between  
5  
6 Chronic Low Back Pain and Bone Mineral Density in Young and  
7  
8 Middle-Aged Males. *Turkiye Fiziksel Tip Ve Rehabilitasyon Dergisi-Turkish*  
9  
10 *Journal of Physical Medicine and Rehabilitation* 2012;**58**(4):294-98.  
11  
12  
13  
14 25. Sterud T, Tynes T. Work-related psychosocial and mechanical risk factors for low  
15  
16 back pain: a 3-year follow-up study of the general working population in  
17  
18 Norway. *Occupational and Environmental Medicine* 2013;**70**(5):296-302.  
19  
20  
21  
22  
23  
24  
25  
26  
27  
28  
29  
30  
31  
32  
33  
34  
35  
36  
37  
38  
39  
40  
41  
42  
43  
44  
45  
46  
47  
48  
49  
50  
51  
52  
53  
54  
55  
56  
57  
58  
59  
60



Table 1 Characteristics of Chinese office workers stratified by the presence of neck pain or low back pain

| Variables                             | Total<br>n=417 | Northwick Park Questionnaire |                 |               |                       | The Oswestry Disability Index |                 |               |                       |
|---------------------------------------|----------------|------------------------------|-----------------|---------------|-----------------------|-------------------------------|-----------------|---------------|-----------------------|
|                                       |                | Low<br>n=149                 | Medium<br>n=137 | High<br>n=131 | <i>P</i> <sup>#</sup> | Low<br>n=162                  | Medium<br>n=121 | High<br>n=134 | <i>P</i> <sup>#</sup> |
| <i>Individual variables:</i>          |                |                              |                 |               |                       |                               |                 |               |                       |
| Gender (n, %)                         |                |                              |                 |               |                       |                               |                 |               |                       |
| Male                                  | 163(39.09)     | 74(49.66)                    | 53(38.69)       | 36(27.48)     | 0.001                 | 74(45.68)                     | 45(37.19)       | 44(32.84)     | 0.069                 |
| Female                                | 254(60.91)     | 75(50.34)                    | 84(61.31)       | 95(72.52)     |                       | 88(54.32)                     | 76(62.81)       | 90(67.16)     |                       |
| Age (years)                           | 29.12(6.79)    | 29.14(7.06)                  | 28.28(7.11)     | 30.00(6.04)   | 0.119                 | 28.81(7.37)                   | 28.32(5.16)     | 30.24(7.27)   | 0.062                 |
| Height (cm)                           | 165.87(11.10)  | 166.66(15.83)                | 166.19(6.79)    | 164.62(7.70)  | 0.289                 | 165.92(15.08)                 | 166.16(7.51)    | 165.55(7.64)  | 0.907                 |
| Weight (kg)                           | 58.01(12.40)   | 59.32(13.44)                 | 57.68(11.21)    | 56.80(12.30)  | 0.236                 | 57.87(13.33)                  | 58.35(11.36)    | 57.86(12.19)  | 0.938                 |
| Body mass index (kg/m <sup>2</sup> )  | 20.90(3.35)    | 21.06(3.32)                  | 20.79(3.28)     | 20.83(3.46)   | 0.766                 | 20.78(3.66)                   | 20.98(2.88)     | 20.98(3.36)   | 0.841                 |
| Education (n, %)                      |                |                              |                 |               |                       |                               |                 |               |                       |
| College or less                       | 117(28.06)     | 35(23.49)                    | 37(27.01)       | 45(34.35)     | 0.123                 | 38(23.46)                     | 34(28.10)       | 45(33.58)     | 0.155                 |
| Bachelor or more                      | 300(71.94)     | 114(76.51)                   | 101(72.99)      | 87(65.65)     |                       | 124(76.54)                    | 87(71.90)       | 89(66.42)     |                       |
| Marriage (n, %)                       |                |                              |                 |               |                       |                               |                 |               |                       |
| Married or other                      | 235(56.35)     | 67(44.97)                    | 70(51.09)       | 45(34.35)     | 0.020                 | 83(51.23)                     | 53(43.80)       | 46(34.33)     | 0.014                 |
| Unmarried                             | 182(43.65)     | 82(55.03)                    | 67(48.91)       | 86(65.65)     |                       | 79(48.77)                     | 68(56.20)       | 88(65.67)     |                       |
| Neck injury (n, %)                    | 14(3.4)        | 1(0.67)                      | 5(3.65)         | 8(6.11)       | 0.028                 | -                             | -               | -             | -                     |
| Low back injury (n, %)                | -              | -                            | -               | -             | -                     | 6(3.70)                       | 11(9.09)        | 20(14.93)     | 0.003                 |
| <i>Work related variables:</i>        |                |                              |                 |               |                       |                               |                 |               |                       |
| Work years (n, %)                     |                |                              |                 |               |                       |                               |                 |               |                       |
| <5 years                              | 204(48.92)     | 80(53.69)                    | 70(51.09)       | 54(41.22)     | 0.094                 | 88(54.32)                     | 60(49.59)       | 56(41.79)     | 0.098                 |
| ≥5 years                              | 213(51.08)     | 69(46.31)                    | 67(48.91)       | 77(58.78)     |                       | 74(45.68)                     | 61(50.41)       | 78(58.21)     |                       |
| Office temperature (n, %)             |                |                              |                 |               |                       |                               |                 |               |                       |
| Cold                                  | 52(12.47)      | 12(8.05)                     | 16(11.68)       | 24(18.32)     | 0.033                 | 9(5.56)                       | 16(13.22)       | 27(20.15)     | 0.001                 |
| Median or hot                         | 365(87.53)     | 137(91.95)                   | 121(88.32)      | 107(81.68)    |                       | 153(94.44)                    | 105(86.78)      | 107(79.85)    |                       |
| Location of computer displayer (n, %) |                |                              |                 |               |                       |                               |                 |               |                       |
| In front                              | 265(63.55)     | 105(70.47)                   | 86(62.77)       | 74(56.49)     | 0.051                 | 113(69.75)                    | 81(66.94)       | 71(52.99)     | 0.008                 |
| Not in front                          | 152(36.45)     | 44(29.53)                    | 52(37.23)       | 57(43.51)     |                       | 49(30.25)                     | 40(33.06)       | 63(47.01)     |                       |
| Computer-using time (n, %)            |                |                              |                 |               |                       |                               |                 |               |                       |
| <8 hours                              | 203(48.68)     | 80(53.69)                    | 62(45.26)       | 61(46.57)     | 0.305                 | 86(53.09)                     | 55(45.45)       | 62(46.27)     | 0.354                 |
| ≥8 hours                              | 214(51.32)     | 69(46.31)                    | 75(54.74)       | 70(53.43)     |                       | 76(46.91)                     | 66(54.55)       | 72(53.73)     |                       |

# Pearson Chi-square test for categorical variables, ANOVA for continuous variables, or Fisher's exact test for categorical variables if the number of cells was < 5.

Table 2 Multinomial logistic regression models for correlates of neck pain

| z                                     | Low  | Medium          |                    |              | High            |                     |              |
|---------------------------------------|------|-----------------|--------------------|--------------|-----------------|---------------------|--------------|
|                                       |      | OR <sup>†</sup> | 95%CI <sup>†</sup> | p value      | OR <sup>†</sup> | 95%CI <sup>†</sup>  | p value      |
| <i>Total subjects:</i>                |      |                 |                    |              |                 |                     |              |
| Age (yrs)                             | Ref. | 0.965           | 0.918-1.016        | 0.176        | 0.993           | 0.944-1.043         | 0.768        |
| BMI <sup>†</sup> (kg/m <sup>2</sup> ) | Ref. | 1.011           | 0.931-1.097        | 0.799        | 1.006           | 0.920-1.099         | 0.901        |
| Male                                  | Ref. | 0.603           | 0.353-1.030        | 0.064        | <b>0.355</b>    | <b>0.197-0.638</b>  | <b>0.001</b> |
| Bachelor or more                      | Ref. | 0.904           | 0.518-1.577        | 0.722        | 0.688           | 0.388-1.220         | 0.201        |
| Married                               | Ref. | 0.664           | 0.350-1.260        | 0.211        | 1.197           | 0.607-2.360         | 0.604        |
| Neck injury                           | Ref. | 7.877           | 0.846-73.312       | 0.070        | <b>9.612</b>    | <b>1.056-87.517</b> | <b>0.045</b> |
| Work years ≥5 yrs                     | Ref. | <b>2.006</b>    | <b>1.038-3.877</b> | <b>0.038</b> | 1.763           | 0.880-3.530         | 0.110        |
| Cold office temperature               | Ref. | 1.045           | 0.459-2.380        | 0.916        | 1.872           | 0.846-4.142         | 0.122        |
| Computer displayer not in front       | Ref. | 1.406           | 0.841-2.351        | 0.194        | <b>1.994</b>    | <b>1.169-3.401</b>  | <b>0.011</b> |
| Computer use ≥8 h/d                   | Ref. | 1.265           | 0.777-2.058        | 0.345        | 1.015           | 0.605-1.701         | 0.956        |
| <i>Male:</i>                          |      |                 |                    |              |                 |                     |              |
| Age (yrs)                             | Ref. | 1.017           | 0.950-1.089        | 0.631        | 0.948           | 0.876-1.026         | 0.183        |
| BMI <sup>†</sup> (kg/m <sup>2</sup> ) | Ref. | 1.019           | 0.897-1.158        | 0.770        | 0.975           | 0.855-1.112         | 0.707        |
| Bachelor or more                      | Ref. | 1.511           | 0.624-3.662        | 0.360        | 0.624           | 0.250-1.558         | 0.313        |
| Married                               | Ref. | 0.521           | 0.190-1.430        | 0.206        | 1.018           | 0.339-3.055         | 0.974        |
| Neck injury                           | Ref. | 7.505           | 0.744-75.673       | 0.087        | 7.975           | 0.674-94.354        | 0.100        |
| Work years ≥5 yrs                     | Ref. | 1.153           | 0.418-8.304        | 0.783        | 2.666           | 0.868-8.188         | 0.087        |
| Cold office temperature               | Ref. | 2.016           | 0.489-8.304        | 0.332        | 1.115           | 0.212-5.855         | 0.898        |
| Computer displayer not in front       | Ref. | 0.660           | 0.296-1.473        | 0.311        | 1.431           | 0.604-3.392         | 0.416        |
| Computer use ≥8 h/d                   | Ref. | 1.237           | 0.590-2.595        | 0.573        | 0.534           | 0.219-1.304         | 0.168        |
| <i>Female*:</i>                       |      |                 |                    |              |                 |                     |              |
| Age (yrs)                             | Ref. | 0.935           | 0.861-1.016        | 0.112        | 1.026           | 0.950-1.109         | 0.509        |
| BMI <sup>†</sup> (kg/m <sup>2</sup> ) | Ref. | 1.008           | 0.900-1.129        | 0.889        | 1.026           | 0.910-1.158         | 0.673        |
| Bachelor or more                      | Ref. | 0.661           | 0.305-1.433        | 0.295        | 0.581           | 0.268-1.259         | 0.169        |
| Married                               | Ref. | 0.812           | 0.336-1.967        | 0.645        | 1.413           | 0.580-3.443         | 0.447        |
| Work years ≥5 yrs                     | Ref. | <b>2.706</b>    | <b>1.052-6.957</b> | <b>0.039</b> | 1.522           | 0.590-3.926         | 0.385        |
| Cold office temperature               | Ref. | 0.787           | 0.277-2.236        | 0.653        | 2.060           | 0.799-5.312         | 0.135        |
| Computer displayer not in front       | Ref. | <b>2.590</b>    | <b>1.257-5.337</b> | <b>0.010</b> | <b>2.939</b>    | <b>1.414-6.108</b>  | <b>0.004</b> |
| Computer use ≥8 h/d                   | Ref. | 1.368           | 0.703-2.664        | 0.356        | 1.363           | 0.696-2.671         | 0.367        |

# Northwick Park Neck Pain Questionnaire. \* The variable of neck injury was excluded from the female regression model because there were no subjects in the low NPQ tertile. † OR, odds ratio; CI, confidence interval; BMI, body mass index.

Table 3 Multinomial logistic regression models for correlates of low back pain

| Variables/ODI <sup>#</sup>            | Low  | Medium          |                     |              | High            |                     |              |
|---------------------------------------|------|-----------------|---------------------|--------------|-----------------|---------------------|--------------|
|                                       |      | OR <sup>†</sup> | 95%CI <sup>†</sup>  | p value      | OR <sup>†</sup> | 95%CI <sup>†</sup>  | p value      |
| <i>Total subjects:</i>                |      |                 |                     |              |                 |                     |              |
| Age (yrs)                             | Ref. | 0.950           | 0.899-1.004         | 0.067        | 1.005           | 0.956-1.056         | 0.848        |
| BMI <sup>†</sup> (kg/m <sup>2</sup> ) | Ref. | 1.040           | 0.953-1.136         | 0.377        | 1.008           | 0.924-1.100         | 0.858        |
| Male                                  | Ref. | 0.720           | 0.416-1.245         | 0.239        | 0.589           | 0.335-1.036         | 0.066        |
| Bachelor or more                      | Ref. | 0.772           | 0.442-1.347         | 0.362        | 0.643           | 0.368-1.124         | 0.122        |
| Married                               | Ref. | 1.652           | 0.864-3.161         | 0.129        | <b>2.078</b>    | <b>1.058-4.081</b>  | <b>0.034</b> |
| Low back injury                       | Ref. | 2.122           | 0.726-6.199         | 0.169        | <b>4.358</b>    | <b>1.653-11.705</b> | <b>0.003</b> |
| Work years ≥5 yrs                     | Ref. | 1.213           | 0.625-2.351         | 0.568        | 1.059           | 0.532-2.105         | 0.871        |
| Cold office temperature               | Ref. | <b>2.429</b>    | <b>1.019-5.791</b>  | <b>0.045</b> | <b>4.173</b>    | <b>1.819-9.573</b>  | <b>0.001</b> |
| Computer displayer not in front       | Ref. | 1.046           | 0.619-1.769         | 0.867        | <b>2.048</b>    | <b>1.219-3.442</b>  | <b>0.007</b> |
| Computer use ≥8 h/d                   | Ref. | 1.232           | 0.751-2.019         | 0.409        | 1.040           | 0.625-1.731         | 0.879        |
| <i>Male:</i>                          |      |                 |                     |              |                 |                     |              |
| Age (yrs)                             | Ref. | <b>0.914</b>    | <b>0.837-0.998</b>  | <b>0.045</b> | 0.978           | 0.912-1.049         | 0.542        |
| BMI <sup>†</sup> (kg/m <sup>2</sup> ) | Ref. | 1.069           | 0.923-1.239         | 0.373        | 0.983           | 0.864-1.119         | 0.797        |
| Bachelor or more                      | Ref. | 0.628           | 0.248-1.589         | 0.326        | <b>0.385</b>    | <b>0.159-0.928</b>  | <b>0.034</b> |
| Married                               | Ref. | 0.911           | 0.316-2.625         | 0.863        | 1.302           | 0.441-3.840         | 0.633        |
| Low back injury                       | Ref. | <b>7.240</b>    | <b>1.304-40.204</b> | <b>0.024</b> | <b>5.775</b>    | <b>1.074-31.065</b> | <b>0.041</b> |
| Work years ≥5 yrs                     | Ref. | 2.735           | 0.951-7.862         | 0.062        | 2.329           | 0.775-6.998         | 0.132        |
| Cold office temperature               | Ref. | 1.454           | 0.325-6.501         | 0.624        | 2.140           | 0.529-8.653         | 0.286        |
| Computer displayer not in front       | Ref. | 0.440           | 0.177-1.093         | 0.077        | 1.291           | 0.570-2.923         | 0.541        |
| Computer use ≥8 h/d                   | Ref. | 1.413           | 0.637-3.134         | 0.394        | 0.712           | 0.310-1.639         | 0.425        |
| <i>Female:</i>                        |      |                 |                     |              |                 |                     |              |
| Age (yrs)                             | Ref. | 0.975           | 0.906-1.050         | 0.501        | 1.028           | 0.958-1.104         | 0.438        |
| BMI <sup>†</sup> (kg/m <sup>2</sup> ) | Ref. | 1.025           | 0.915-1.149         | 0.669        | 1.030           | 0.914-1.161         | 0.626        |
| Bachelor or more                      | Ref. | 0.821           | 0.393-1.717         | 0.601        | 0.790           | 0.372-1.678         | 0.540        |
| Married                               | Ref. | <b>3.310</b>    | <b>1.343-8.158</b>  | <b>0.009</b> | <b>3.501</b>    | <b>1.392-8.805</b>  | <b>0.008</b> |
| Low back injury                       | Ref. | 0.922           | 0.185-4.595         | 0.921        | <b>4.205</b>    | <b>1.175-15.042</b> | <b>0.027</b> |
| Work years ≥5 yrs                     | Ref. | 0.607           | 0.239-1.539         | 0.292        | 0.566           | 0.219-1.463         | 0.240        |
| Cold office temperature               | Ref. | 2.877           | 0.922-8.980         | 0.069        | <b>5.352</b>    | <b>1.787-16.028</b> | <b>0.003</b> |
| Computer displayer not in front       | Ref. | 1.930           | 0.955-3.900         | 0.067        | <b>3.215</b>    | <b>1.581-6.539</b>  | <b>0.001</b> |
| Computer use ≥8 h/d                   | Ref. | 1.081           | 0.559-2.090         | 0.816        | 1.126           | 0.570-2.225         | 0.732        |

# Oswestry low back pain disability index. † OR, odds ratio; CI, confidence interval; BMI, body mass index.

STROBE 2007 (v4) Statement—Checklist of items that should be included in reports of cross-sectional studies

| Section/Topic             | Item # | Recommendation                                                                                                                                                                       | Reported on page # |
|---------------------------|--------|--------------------------------------------------------------------------------------------------------------------------------------------------------------------------------------|--------------------|
| Title and abstract        | 1      | (a) Indicate the study’s design with a commonly used term in the title or the abstract                                                                                               | 2                  |
|                           |        | (b) Provide in the abstract an informative and balanced summary of what was done and what was found                                                                                  | 2                  |
| <b>Introduction</b>       |        |                                                                                                                                                                                      |                    |
| Background/rationale      | 2      | Explain the scientific background and rationale for the investigation being reported                                                                                                 | 4                  |
| Objectives                | 3      | State specific objectives, including any prespecified hypotheses                                                                                                                     | 4                  |
| <b>Methods</b>            |        |                                                                                                                                                                                      |                    |
| Study design              | 4      | Present key elements of study design early in the paper                                                                                                                              | 5                  |
| Setting                   | 5      | Describe the setting, locations, and relevant dates, including periods of recruitment, exposure, follow-up, and data collection                                                      | 5                  |
| Participants              | 6      | (a) Give the eligibility criteria, and the sources and methods of selection of participants                                                                                          | 5                  |
| Variables                 | 7      | Clearly define all outcomes, exposures, predictors, potential confounders, and effect modifiers. Give diagnostic criteria, if applicable                                             | 5                  |
| Data sources/ measurement | 8*     | For each variable of interest, give sources of data and details of methods of assessment (measurement). Describe comparability of assessment methods if there is more than one group | 5                  |
| Bias                      | 9      | Describe any efforts to address potential sources of bias                                                                                                                            | 5-6                |
| Study size                | 10     | Explain how the study size was arrived at                                                                                                                                            | 5                  |
| Quantitative variables    | 11     | Explain how quantitative variables were handled in the analyses. If applicable, describe which groupings were chosen and why                                                         | 5                  |
| Statistical methods       | 12     | (a) Describe all statistical methods, including those used to control for confounding                                                                                                | 5-6                |
|                           |        | (b) Describe any methods used to examine subgroups and interactions                                                                                                                  | 5-6                |
|                           |        | (c) Explain how missing data were addressed                                                                                                                                          | 5-6                |
|                           |        | (d) If applicable, describe analytical methods taking account of sampling strategy                                                                                                   | 5-6                |
|                           |        | (e) Describe any sensitivity analyses                                                                                                                                                | 5-6                |
| <b>Results</b>            |        |                                                                                                                                                                                      |                    |

1  
2  
3  
4  
5  
6  
7  
8  
9  
10  
11  
12  
13  
14  
15  
16  
17  
18  
19  
20  
21  
22  
23  
24  
25  
26  
27  
28  
29  
30  
31  
32  
33  
34  
35  
36  
37  
38  
39  
40  
41  
42  
43  
44  
45  
46  
47  
48  
49

|                          |     |                                                                                                                                                                                                              |      |
|--------------------------|-----|--------------------------------------------------------------------------------------------------------------------------------------------------------------------------------------------------------------|------|
| Participants             | 13* | (a) Report numbers of individuals at each stage of study—eg numbers potentially eligible, examined for eligibility, confirmed eligible, included in the study, completing follow-up, and analysed            | 6    |
|                          |     | (b) Give reasons for non-participation at each stage                                                                                                                                                         | 5    |
|                          |     | (c) Consider use of a flow diagram                                                                                                                                                                           | ns   |
| Descriptive data         | 14* | (a) Give characteristics of study participants (eg demographic, clinical, social) and information on exposures and potential confounders                                                                     | 6-7  |
|                          |     | (b) Indicate number of participants with missing data for each variable of interest                                                                                                                          | 5    |
| Outcome data             | 15* | Report numbers of outcome events or summary measures                                                                                                                                                         | 6    |
| Main results             | 16  | (a) Give unadjusted estimates and, if applicable, confounder-adjusted estimates and their precision (eg, 95% confidence interval). Make clear which confounders were adjusted for and why they were included | 7-11 |
|                          |     | (b) Report category boundaries when continuous variables were categorized                                                                                                                                    | 5    |
|                          |     | (c) If relevant, consider translating estimates of relative risk into absolute risk for a meaningful time period                                                                                             | ns   |
| Other analyses           | 17  | Report other analyses done—eg analyses of subgroups and interactions, and sensitivity analyses                                                                                                               | 10   |
| <b>Discussion</b>        |     |                                                                                                                                                                                                              |      |
| Key results              | 18  | Summarise key results with reference to study objectives                                                                                                                                                     | 11   |
| Limitations              | 19  | Discuss limitations of the study, taking into account sources of potential bias or imprecision. Discuss both direction and magnitude of any potential bias                                                   | 13   |
| Interpretation           | 20  | Give a cautious overall interpretation of results considering objectives, limitations, multiplicity of analyses, results from similar studies, and other relevant evidence                                   | 11   |
| Generalisability         | 21  | Discuss the generalisability (external validity) of the study results                                                                                                                                        | 13   |
| <b>Other information</b> |     |                                                                                                                                                                                                              |      |
| Funding                  | 22  | Give the source of funding and the role of the funders for the present study and, if applicable, for the original study on which the present article is based                                                | 14   |

\*Give information separately for cases and controls in case-control studies and, if applicable, for exposed and unexposed groups in cohort and cross-sectional studies.

**Note:** An Explanation and Elaboration article discusses each checklist item and gives methodological background and published examples of transparent reporting. The STROBE checklist is best used in conjunction with this article (freely available on the Web sites of PLoS Medicine at <http://www.plosmedicine.org/>, Annals of Internal Medicine at <http://www.annals.org/>, and Epidemiology at <http://www.epidem.com/>). Information on the STROBE Initiative is available at [www.strobe-statement.org](http://www.strobe-statement.org).

# BMJ Open

## Risk factors of non-specific neck pain and low back pain in computer-using office workers in China: a cross-sectional study

|                                 |                                                                                                                                                                                                                                                                                     |
|---------------------------------|-------------------------------------------------------------------------------------------------------------------------------------------------------------------------------------------------------------------------------------------------------------------------------------|
| Journal:                        | <i>BMJ Open</i>                                                                                                                                                                                                                                                                     |
| Manuscript ID                   | bmjopen-2016-014914.R1                                                                                                                                                                                                                                                              |
| Article Type:                   | Research                                                                                                                                                                                                                                                                            |
| Date Submitted by the Author:   | 25-Jan-2017                                                                                                                                                                                                                                                                         |
| Complete List of Authors:       | Ye, Sunyue; Zhejiang University; Zhejiang Financial College<br>Jing, Qinglei; Zhejiang Financial College, Physical Activity and Health Research Institute<br>Wei, Chen; Zhejiang University<br>Lu, Jie; Zhejiang Financial College, Physical Activity and Health Research Institute |
| <b>Primary Subject Heading</b>: | Occupational and environmental medicine                                                                                                                                                                                                                                             |
| Secondary Subject Heading:      | Public health, Epidemiology                                                                                                                                                                                                                                                         |
| Keywords:                       | Low back disorder, Computer use, Musculoskeletal pain, White-collar worker, Self-reported questionnaire                                                                                                                                                                             |
|                                 |                                                                                                                                                                                                                                                                                     |

SCHOLARONE™  
Manuscripts

1  
2  
3 **Risk factors of non-specific neck pain and low back pain in**  
4  
5  
6 **computer-using office workers in China: a cross-sectional**  
7  
8 **study**  
9  
10

11  
12  
13  
14 Sunyue Ye<sup>1,2\*</sup>, Qinglei Jing<sup>2</sup>, Chen Wei<sup>1,3</sup>, Jie Lu<sup>2</sup>  
15

16  
17 1. Chronic Disease Research Institute, Zhejiang University School of Public Health,  
18 Hangzhou, China, 310058.  
19

20  
21 2. Physical Activity and Health Research Institute, Zhejiang Financial College,  
22 Hangzhou, China, 310018.  
23

24  
25 3. Stanford Prevention Research Center, School of Medicine, Stanford University, CA,  
26 Unite States, 94305.  
27  
28

29  
30  
31  
32  
33 **\* Corresponding Author:**  
34

35 Sunyue Ye, PhD  
36

37  
38 Chronic Disease Research Institute, and Department of Nutrition and Food Hygiene  
39 Zhejiang University School of Public Health,  
40 866 Yu-hang-tang Road, Hangzhou, Zhejiang 310058 China.  
41  
42

43  
44 Tel: (+86) 571-8820-8591 or (+86) 13588115849  
45

46  
47 E-mail: [yesunyue@zju.edu.cn](mailto:yesunyue@zju.edu.cn)  
48  
49  
50  
51  
52  
53  
54  
55  
56  
57  
58  
59  
60

## Abstract

**Objectives:** Several studies have found that inappropriate workstations are associated with musculoskeletal disorders. The present cross-sectional study aimed to identify the risk factors of non-specific neck pain (NP) and low back pain (LBP) among computer-using workers. **Design:** Observational study with a cross-sectional sample. **Setting:** This study surveyed 15 companies in Zhejiang province, China. **Participants:** After excluding participants with missing variables, 417 office workers, including 163 men and 254 women, were analyzed. **Outcome measures:** Demographic information was collected by self-report. The standard Northwick Park Neck Pain Questionnaire and Oswestry Low Back Pain Disability Index, along with other relevant questions, were used to assess the potential occupational factors and perceived levels of pain. Multinomial logistic regression analysis, adjusted for age, sex, body mass index, education, marriage status, and neck/low back injury, was performed. **Results:** Compared with low-level NP, the computer location (monitor not in front) was associated with odds ratios (ORs) of 2.6 and 2.9 for medium- and high-level NP, respectively. For LBP, high-level pain was associated with an OR of 3.2 compared with low-level pain in females. Significant associations were also observed between the office temperature (OR: 5.4 for high vs. low) and LBP, and between office work  $\geq 5$  years (OR: 2.7 for medium vs. low) and NP in female office workers. **Conclusions:** Not having the computer monitor located in front was an important risk factor of NP and LBP in computer-using female workers. This information not only enables the development of potential preventive strategies but also provides new insights for designing appropriate workstations.



**Strengths and limitations of this study:**

- This is the first study on the associations of the horizontal location of the computer monitor with neck pain and low back pain in Chinese computer users.
- However, most participants were young and recruited via the identification of college alumni, limiting the generalizability of our findings.
- Further, this study did not explore the relationships between the exact angle of the computer monitor location and neck pain/low back pain based on objective measurements.

**Keywords:** Low back disorder; Computer use; Musculoskeletal pain; White-collar worker; Self-reported questionnaire.

## Introduction

Non-specific neck pain (NP) and low back pain (LBP) are highly common musculoskeletal disorders and the leading causes of disability worldwide[1]. It has been well established that NP and LBP are not only risk factors of severe spine problems or functional disability, but are also associated with decreased quality of life and productivity of workers[2]. Of note, although NP and LBP are musculoskeletal conditions affecting different body parts, they generally have similar symptoms, hazards, and etiology[3].

The risk factors of NP or LBP are commonly multidimensional, including muscular, skeletal, and nervous system-related factors; can be both modifiable and non-modifiable; and can be divided into individual and occupational factors. Individual factors related to NP and/or LBP include, among others, sex, age, history of neck/low back injury, and psychological factors (e.g., mental stress, anxiety, depression, and social support) [4 5]. In addition, a few studies have also indicated that occupational factors, including prolonged sedentary or office work hours, high work load/demands, and inappropriate workstation design, are associated with NP and/or LBP [6-8].

Sedentary or office workers in schools, hospitals, or the military have been observed to have high incidences and prevalence of NP and LBP[9-11]. This might be caused by their prolonged sitting time and specific body postures, such as inappropriate neck or low back flexion or rotation, and other workplace environmental factors[12]. However, the current literature on modifiable determinants of NP/LBP among office workers in modern workplace environments, where intensive computer use is common, is insufficient[13]. Thus, the present study aimed

1  
2  
3 to explore the associations of occupational risk factors with NP and LBP in computer-  
4  
5 using office workers.  
6

## 7 8 **Methods**

### 9 10 *Participants*

11  
12 This cross-sectional study was conducted in 15 financial organizations,  
13  
14 Zhejiang, China. A total of 425 office workers, aged 18-59 years, were recruited and  
15  
16 investigated based on cluster sampling from September to December 2015, via the  
17  
18 identification of alumni of Zhejiang Financial College. All participants gave informed  
19  
20 consent before participating in the study. After excluding participants with missing  
21  
22 individual and/or occupational information (n=8), 417 participants were included in  
23  
24 the final analysis. The study was granted approval by Zhejiang Financial College's  
25  
26 Institutional Review Board.  
27  
28

### 29 30 *Data collection and variable definitions*

31  
32 Data were collected by mailed questionnaires, which included the Northwick  
33  
34 Park Neck Pain Questionnaire (NPQ)[14] and the Oswestry Low Back Pain Disability  
35  
36 Index (ODI)[15] to measure NP and LBP, respectively[16]. Individual and  
37  
38 demographic information, including sex, age, height, weight, education, marriage  
39  
40 status, and history of general neck/low back injuries, was collected by a questionnaire.  
41  
42 Based on previous literature and a pre-survey, the potential occupational risk factors  
43  
44 (e.g., years of office work at current job, office temperature, location of the computer  
45  
46 monitor, and duration of computer use per day) were determined by self-report.  
47  
48 Participants with non-specific NP or LBP were defined by a self-rated value of the  
49  
50 NPQ or ODI of > 0. Body mass index (BMI) was calculated as the weight (kg)  
51  
52 divided by the squared height (m<sup>2</sup>). All data were double-entered and checked with  
53  
54 Epidata 3.1.  
55  
56  
57  
58  
59  
60

### *Statistical analysis*

First, we classified the values of the NPQ and ODI into tertiles (low: ODI<0.19 and NPQ<0.25, medium:  $0.19 \leq \text{ODI} < 0.24$  and  $0.25 \leq \text{NPQ} < 0.34$ , and high: ODI $\geq 0.24$  and NPQ $\geq 0.34$ ). To test the differences in the categorical variables according to the NPQ or ODI results, the Chi-square test or Fisher's exact test was used if the cell number was <5, while ANOVA was used for continuous variables. Independent associations of occupational variables with the NPQ or ODI were analyzed using multinomial logistic or linear regression models in the total participants and stratified by sex, because significant interactions between sex and the occupational variables were observed in the present study. The results are presented as the odds ratios (ORs) with 95% confidence intervals (CIs). A sensitivity analysis was conducted by including participants with missing variables, encoded as the mean for continuous variables and mode for categorical variables. All statistical analyses were conducted with IBM SPSS 20.0 (IBM Corporation, New York, USA). Statistical significance was defined as  $p < 0.05$ .

### **Results**

The characteristics of the participants are shown in Table 1. The mean age was 29.1 ( $\pm 6.8$ ) years. The point prevalence rates of NP and LBP (mild to severe levels of pain) were 86.3% and 75.5%, respectively; participants with NP combined with LBP accounted for 71.5%. The differences in sex, marriage status, history of neck injury, and office temperature among the NPQ tertiles were significant ( $p < 0.05$ ). Similarly, the differences in marital status, history of low back injury, office temperature, and location of the computer monitor significantly differed among the ODI tertiles ( $p < 0.05$ ).

1  
2  
3 Table 2 shows the results of the multinomial logistic and linear regression  
4 analyses of individual and occupational factors related to NP. In the total participants,  
5 compared with the low NPQ, office work  $\geq 5$  years, sex, history of neck injury, and  
6 computer monitor not located in front (i.e. on the right or left side of the operator)  
7 were significantly associated with the high NPQ after adjusting for age, BMI, sex,  
8 education, marriage status, and history of neck injury. Significant linear associations  
9 of NP (continuous variable) with female sex, neck injury, cold office temperature, and  
10 computer displayer not in front were also observed ( $p < 0.05$ ). Among the male  
11 participants, no significant associations were observed between occupational factors  
12 and the NPQ tertiles, except for neck injury, in the linear regression model. In females,  
13 having the computer monitor not located in front and cold office temperature were  
14 significant risk factors for the higher NPQ tertiles, while office work  $\geq 5$  years (vs.  $<$   
15 5 years) was a significant risk factor for the medium, but not high, NPQ ( $p > 0.05$ ).  
16  
17  
18  
19  
20  
21  
22  
23  
24  
25  
26  
27  
28  
29  
30  
31

32 The results of the multinomial logistic and linear regression analyses for LBP  
33 are presented in Table 3. In the total participants, compared with the low ODI,  
34 married status, history of low back injury, cold office temperature, and the computer  
35 monitor not located in front were significant risk factors for LBP after adjusting for  
36 age, BMI, sex, and education. In males, age, history of low back injury, and education  
37 were significant risk factors for LBP, while no significant associations were observed  
38 between occupational factors and the ODI tertiles. In females, married individuals,  
39 low back injury, cold office temperature, and not having the computer monitor in  
40 front were significantly related to higher levels of LBP. Additionally, the results  
41 showed no significant differences between the included and excluded the participants  
42 with missing variables.  
43  
44  
45  
46  
47  
48  
49  
50  
51  
52  
53  
54  
55

## 56 Discussion

57  
58  
59  
60

1  
2  
3 In the present study, having the computer monitor not located in front (i.e. on  
4 the right or left side), cold office temperature, and office work  $\geq 5$  years were  
5 significantly associated with non-specific NP and/or LBP after controlling for age,  
6  
7  
8  
9  
10  
11  
12  
13  
14  
15  
16  
17  
18  
19  
20  
21  
22  
23  
24  
25  
26  
27  
28  
29  
30  
31  
32  
33  
34  
35  
36  
37  
38  
39  
40  
41  
42  
43  
44  
45  
46  
47  
48  
49  
50  
51  
52  
53  
54  
55  
56  
57  
58  
59  
60

significantly associated with non-specific NP and/or LBP after controlling for age, BMI, sex, education, marital status, and history of neck/low back injury. This result has significance for developing prevention or intervention strategies against non-specific NP and LBP in computer-using office workers.

Previous researches on the associations of specific adjustable behavioral or occupational factors among intensive computer-using office workers with non-specific NP/LBP are scarce, although epidemiological evidence of a correlation between computer-using time and NP/LBP has been well established [6 17 18]. A few studies have indicated that psychosocial stress, long work hours, poor social support, and neck/low back flexion/bending in the workplace might be occupational risk factors[7 8 12]. Paksaichol et al. indicated that improper height (vertical level) of video display units might be an indirect risk factor associated with neck pain[19]. However, to our knowledge, few studies have indicated that the location of the computer monitor (lateral level) is an important risk factor of non-specific NP/LBP. Prolonged and repeated body trunk over-rotation/flexion might cause non-specific NP/LBP by damaging the musculoskeletal system of the neck or low back[20 21], as the individual needs to turn around and face the computer monitor if it is not located directly in front. Especially, many workstations in various organizations and companies are multifaceted, requiring the office workers or operators to rotate their body/trunk continuously while working. These results provide a direction for future workstation designs in related industries.

In addition, it has been well established that cold stimulation is a risk factor of musculoskeletal pain[22-24]. Our study also found that there was an association

1  
2  
3 between cold office temperature and non-specific NP and LBP, providing further  
4  
5 evidence for this possible causal relationship, although there might be reciprocal  
6  
7 causation between these two variables, with individuals with NP and LBP potentially  
8  
9 being much more susceptible to cold environments (lower office temperature) or  
10  
11 experiencing enhanced perceived pain via their sensory nerves[25]. Conversely, it can  
12  
13 be speculated that a warm office temperature might be associated with less non-  
14  
15 specific NP and LBP among intensive computer users or sedentary workers.  
16  
17

18  
19 In this study, we further found that longer work years and injuries of the  
20  
21 neck/low back were associated with both non-specific NP and LBP, as were female  
22  
23 sex and married individuals. These results are consistent with those of previous  
24  
25 studies[6-8]. Women are known to have a higher prevalence of NP/LBP and to be  
26  
27 more susceptible to environmental risk factors than men. This might be due to their  
28  
29 physical inactivity, lower bone mineral density, and specific anatomical structure [26-  
30  
31 28]. The reason why BMI, education, and computer-using time were not significantly  
32  
33 associated with NP/LBP may be because of the narrow distribution of these variables  
34  
35 in our limited study sample. Our participants were younger (85% of the participants  
36  
37 were younger than 35 years) than the general industrial workers in China, and it is  
38  
39 difficult to determine whether there is statistical significance based on variables with  
40  
41 such a narrow distribution.  
42  
43  
44

45  
46 There were some limitations in this study that need to be acknowledged. Due  
47  
48 to the cross-sectional design of the study and the relative small sample size, we were  
49  
50 unable to detect the causality and other potential risk factors. Meanwhile, as  
51  
52 mentioned above, most participants were young and comprised intensive computer  
53  
54 users and financial office workers. Thus, care must be taken when generalizing our  
55  
56 results to other populations. Lastly, the use of a self-report questionnaire might  
57  
58  
59  
60

1  
2  
3 generate systematical bias. Although physical factors can be assessed objectively,  
4  
5 most previous studies used self-reported questionnaires for measuring non-specific  
6  
7 pain and individual or environmental factors[5 7 8 29]. Nevertheless, in this study, we  
8  
9 assessed and verified the significance of various occupational and environmental risk  
10  
11 factors, including the location of the computer monitor and the office temperature, for  
12  
13 non-specific NP/LBP. These findings are important for modern office workers,  
14  
15 especially for those who are intensive computer users.  
16  
17

## 18 **Conclusions**

20  
21 Location of the computer monitor not in front (i.e. on the left or right side) of  
22  
23 the operator and cold office temperature are modifiable occupational risk factors of  
24  
25 non-specific NP and LBP in computer-using office workers. Additionally, a history of  
26  
27 neck/low back injury, longer office work years, female sex, and married individuals  
28  
29 were also identified as important occupational or individual determinants that  
30  
31 correlate with NP/LBP. Accordingly, our results indicate that ensuring proper  
32  
33 horizontal position of the computer monitor and maintaining a relative warm office  
34  
35 environment are important for preventing NP and LBP, especially in neck- and/or  
36  
37 back-injured intensive computer-using female office workers. Further prospective  
38  
39 studies using objective measurements of work-related body posture and repetitiveness  
40  
41 are required to confirm our findings.  
42  
43  
44  
45  
46  
47

## 48 **Acknowledgements**

49  
50 We would like to thank Jingxia Fan, Lengyu Guo, Jinghao Zhang, Jiayi Zhou,  
51  
52 Zhuoyuan Zhao, Ze Yu, Binbin Dong, Haiou Miao, Yanbo Cen, Luna Xu, Yan Quan,  
53  
54 Tingting Wu, Jie Chen, Lina Zhang, and Sheng Chen for data collection, and Editage  
55  
56 [www.editage.cn] for English language editing.  
57  
58  
59  
60



**Funding:**

This study was supported by Zhejiang Financial Education Foundation (grant 2014-19).

**References:**

1. Vassilaki M, Hurwitz EL. Insights in public health: perspectives on pain in the low back and neck: global burden, epidemiology, and management. *Hawai'i journal of medicine & public health : a journal of Asia Pacific Medicine & Public Health* 2014;**73**(4):122-6
2. Matsudaira K, Kawaguchi M, Isomura T, et al. Assessment of psychosocial risk factors for the development of non-specific chronic disabling low back pain in Japanese workers-findings from the Japan Epidemiological Research of Occupation-related Back Pain (JOB) study. *Industrial health* 2015;**53**(4):368-77 doi: 10.2486/indhealth.2014-0260[published Online First: Epub Date]].
3. Mayer J, Kraus T, Ochsmann E. Longitudinal evidence for the association between work-related physical exposures and neck and/or shoulder complaints: a systematic review. *International archives of occupational and environmental health* 2012;**85**(6):587-603 doi: 10.1007/s00420-011-0701-0[published Online First: Epub Date]].
4. Kindler LL, Jones KD, Perrin N, Bennett RM. Risk factors predicting the development of widespread pain from chronic back or neck pain. *The journal of pain : official journal of the American Pain Society* 2010;**11**(12):1320-8 doi: 10.1016/j.jpain.2010.03.007[published Online First: Epub Date]].

- 1  
2  
3 5. Noormohammadpour P, Mansournia MA, Asadi-Lari M, Nourian R, Rostami M,  
4  
5 Kordi R. A Subtle Threat to Urban Populations in Developing Countries: Low  
6  
7 Back Pain and its Related Risk Factors. *Spine* 2016;**41**(7):618-27 doi:  
8  
9 10.1097/BRS.0000000000001269[published Online First: Epub Date]].  
10  
11  
12 6. Paksaichol A, Janwantanakul P, Purepong N, Pensri P, van der Beek AJ. Office  
13  
14 workers' risk factors for the development of non-specific neck pain: a  
15  
16 systematic review of prospective cohort studies. *Occupational and*  
17  
18 *environmental medicine* 2012;**69**(9):610-8 doi: 10.1136/oemed-2011-  
19  
20 100459[published Online First: Epub Date]].  
21  
22  
23 7. Yang H, Hitchcock E, Haldeman S, et al. Workplace psychosocial and  
24  
25 organizational factors for neck pain in workers in the United States. *American*  
26  
27 *journal of industrial medicine* 2016;**59**(7):549-60 doi:  
28  
29 10.1002/ajim.22602[published Online First: Epub Date]].  
30  
31  
32 8. Yang H, Haldeman S, Nakata A, Choi B, Delp L, Baker D. Work-related risk  
33  
34 factors for neck pain in the US working population. *Spine* 2015;**40**(3):184-92  
35  
36 doi: 10.1097/BRS.0000000000000700[published Online First: Epub Date]].  
37  
38  
39 9. Chiu TT, Lam PK. The prevalence of and risk factors for neck pain and upper limb  
40  
41 pain among secondary school teachers in Hong Kong. *Journal of occupational*  
42  
43 *rehabilitation* 2007;**17**(1):19-32 doi: 10.1007/s10926-006-9046-z[published  
44  
45 Online First: Epub Date]].  
46  
47  
48 10. De Loose V, Burnotte F, Cagnie B, Stevens V, Van Tiggelen D. Prevalence and  
49  
50 risk factors of neck pain in military office workers. *Military medicine*  
51  
52 2008;**173**(5):474-9  
53  
54  
55  
56  
57  
58  
59  
60

- 1  
2  
3 11. Erick PN, Smith DR. Low back pain among school teachers in Botswana,  
4  
5 prevalence and risk factors. BMC musculoskeletal disorders 2014;**15**:359 doi:  
6  
7 10.1186/1471-2474-15-359[published Online First: Epub Date]].  
8  
9  
10 12. Yue P, Liu F, Li L. Neck/shoulder pain and low back pain among school teachers  
11  
12 in China, prevalence and risk factors. BMC public health 2012;**12**:789 doi:  
13  
14 10.1186/1471-2458-12-789[published Online First: Epub Date]].  
15  
16 13. McLean SM, May S, Klaber-Moffett J, Sharp DM, Gardiner E. Risk factors for  
17  
18 the onset of non-specific neck pain: a systematic review. Journal of  
19  
20 epidemiology and community health 2010;**64**(7):565-72 doi:  
21  
22 10.1136/jech.2009.090720[published Online First: Epub Date]].  
23  
24 14. Sim J, Jordan K, Lewis M, Hill J, Hay EM, Dziedzic K. Sensitivity to change and  
25  
26 internal consistency of the Northwick Park Neck Pain Questionnaire and  
27  
28 derivation of a minimal clinically important difference. The Clinical journal of  
29  
30 pain 2006;**22**(9):820-6 doi: 10.1097/01.ajp.0000210937.58439.39[published  
31  
32 Online First: Epub Date]].  
33  
34 15. Sheahan PJ, Nelson-Wong EJ, Fischer SL. A review of culturally adapted  
35  
36 versions of the Oswestry Disability Index: the adaptation process, construct  
37  
38 validity, test-retest reliability and internal consistency. Disability and  
39  
40 rehabilitation 2015:1-8 doi: 10.3109/09638288.2015.1019647[published  
41  
42 Online First: Epub Date]].  
43  
44 16. Murphy DR, Lopez M. Neck and back pain specific outcome assessment  
45  
46 questionnaires in the Spanish language: a systematic literature review. The  
47  
48 spine journal : official journal of the North American Spine Society  
49  
50 2013;**13**(11):1667-74 doi: 10.1016/j.spinee.2013.08.046[published Online  
51  
52 First: Epub Date]].  
53  
54  
55  
56  
57  
58  
59  
60

- 1  
2  
3 17. Korhonen T, Ketola R, Toivonen R, Luukkonen R, Hakkanen M, Viikari-Juntura  
4  
5 E. Work related and individual predictors for incident neck pain among office  
6  
7 employees working with video display units. *Occupational and environmental*  
8  
9 *medicine* 2003;**60**(7):475-82  
10  
11  
12 18. Shete KM, Suryawanshi P, Gandhi N. Management of low back pain in computer  
13  
14 users: A multidisciplinary approach. *Journal of craniovertebral junction &*  
15  
16 *spine* 2012;**3**(1):7-10 doi: 10.4103/0974-8237.110117[published Online First:  
17  
18 Epub Date]].  
19  
20  
21 19. Paksaichol A, Lawsirirat C, Janwantanakul P. Contribution of biopsychosocial  
22  
23 risk factors to nonspecific neck pain in office workers: A path analysis model.  
24  
25 *Journal of occupational health* 2015;**57**(2):100-9 doi: 10.1539/joh.14-0124-  
26  
27 OA[published Online First: Epub Date]].  
28  
29  
30 20. Ambusam S, Baharudin O, Roslizawati N, Leonard J. Position of document holder  
31  
32 and work related risk factors for neck pain among computer users: a narrative  
33  
34 review. *La Clinica terapeutica* 2015;**166**(6):256-61 doi:  
35  
36 10.7417/CT.2015.1898[published Online First: Epub Date]].  
37  
38  
39 21. Hoogendoorn WE, Bongers PM, de Vet HC, et al. Flexion and rotation of the  
40  
41 trunk and lifting at work are risk factors for low back pain: results of a  
42  
43 prospective cohort study. *Spine* 2000;**25**(23):3087-92  
44  
45  
46 22. Pienimaki T, Karppinen J, Rintamaki H, et al. Prevalence of cold-related  
47  
48 musculoskeletal pain according to self-reported threshold temperature among  
49  
50 the Finnish adult population. *European journal of pain* 2014;**18**(2):288-98 doi:  
51  
52 10.1002/j.1532-2149.2013.00368.x[published Online First: Epub Date]].  
53  
54  
55 23. Burstrom L, Jarvholm B, Nilsson T, Wahlstrom J. Back and neck pain due to  
56  
57 working in a cold environment: a cross-sectional study of male construction  
58  
59  
60

- 1  
2  
3 workers. International archives of occupational and environmental health  
4  
5 2013;**86**(7):809-13 doi: 10.1007/s00420-012-0818-9[published Online First:  
6  
7 Epub Date]].
- 8  
9  
10 24. Dovrat E, Katz-Leurer M. Cold exposure and low back pain in store workers in  
11  
12 Israel. American journal of industrial medicine 2007;**50**(8):626-31 doi:  
13  
14 10.1002/ajim.20488[published Online First: Epub Date]].
- 15  
16 25. Fernandes ES, Russell FA, Alawi KM, et al. Environmental cold exposure  
17  
18 increases blood flow and affects pain sensitivity in the knee joints of CFA-  
19  
20 induced arthritic mice in a TRPA1-dependent manner. Arthritis research &  
21  
22 therapy 2016;**18**:7 doi: 10.1186/s13075-015-0905-x[published Online First:  
23  
24 Epub Date]].
- 25  
26  
27 26. Briggs AM, Straker LM, Burnett AF, Wark JD. Chronic low back pain is  
28  
29 associated with reduced vertebral bone mineral measures in community-  
30  
31 dwelling adults. BMC musculoskeletal disorders 2012;**13**:49 doi:  
32  
33 10.1186/1471-2474-13-49[published Online First: Epub Date]].
- 34  
35  
36 27. Hiz O, Ediz L, Ercan S, Arslan M, Avcu S, Tekeoglu I. The Relationship Between  
37  
38 Chronic Low Back Pain and Bone Mineral Density in Young and Middle-  
39  
40 Aged Males. Turk Fiz Tip Rehab D 2012;**58**(4):294-98 doi:  
41  
42 10.4274/tftr.37267[published Online First: Epub Date]].
- 43  
44  
45 28. Muntner P, Gu D, Wildman RP, et al. Prevalence of physical activity among  
46  
47 Chinese adults: results from the International Collaborative Study of  
48  
49 Cardiovascular Disease in Asia. American journal of public health  
50  
51 2005;**95**(9):1631-6 doi: 10.2105/AJPH.2004.044743[published Online First:  
52  
53 Epub Date]].
- 54  
55  
56  
57  
58  
59  
60

- 1  
2  
3 29. Sterud T, Tynes T. Work-related psychosocial and mechanical risk factors for low  
4  
5 back pain: a 3-year follow-up study of the general working population in  
6  
7 Norway. Occupational and environmental medicine 2013;**70**(5):296-302 doi:  
8  
9 10.1136/oemed-2012-101116[published Online First: Epub Date].  
10  
11  
12  
13  
14  
15  
16  
17  
18  
19  
20  
21  
22  
23  
24  
25  
26  
27  
28  
29  
30  
31  
32  
33  
34  
35  
36  
37  
38  
39  
40  
41  
42  
43  
44  
45  
46  
47  
48  
49  
50  
51  
52  
53  
54  
55  
56  
57  
58  
59  
60

Table 1 Characteristics of Chinese office workers stratified by the presence of neck pain or low back pain

| Variables                             | Total<br>n=417 | Northwick Park Questionnaire |                 |               |                       | <i>P</i> <sup>#</sup> | The Oswestry Disability Index |                 |               |                       |
|---------------------------------------|----------------|------------------------------|-----------------|---------------|-----------------------|-----------------------|-------------------------------|-----------------|---------------|-----------------------|
|                                       |                | Low<br>n=149                 | Medium<br>n=137 | High<br>n=131 | <i>P</i> <sup>#</sup> |                       | Low<br>n=162                  | Medium<br>n=121 | High<br>n=134 | <i>P</i> <sup>#</sup> |
| <i>Individual variables:</i>          |                |                              |                 |               |                       |                       |                               |                 |               |                       |
| Gender (n, %)                         |                |                              |                 |               |                       |                       |                               |                 |               |                       |
| Male                                  | 163(39.1)      | 74(49.7)                     | 53(38.7)        | 36(27.5)      | 0.001                 | 74(45.7)              | 45(37.2)                      | 44(32.8)        | 0.069         |                       |
| Female                                | 254(60.9)      | 75(50.3)                     | 84(61.3)        | 95(72.5)      |                       | 88(54.3)              | 76(62.8)                      | 90(67.2)        |               |                       |
| Age (years)                           | 29.1(6.8)      | 29.1(7.1)                    | 28.3(7.1)       | 30.0(6.0)     | 0.119                 | 28.8(7.4)             | 28.3(5.2)                     | 30.2(7.3)       | 0.062         |                       |
| Height (cm)                           | 165.9(11.1)    | 166.7(15.8)                  | 166.2(6.8)      | 164.6(7.7)    | 0.289                 | 165.9(15.1)           | 166.2(7.5)                    | 165.6(7.6)      | 0.907         |                       |
| Weight (kg)                           | 58.0(12.4)     | 59.3(13.4)                   | 57.7(11.2)      | 56.8(12.3)    | 0.236                 | 57.9(13.3)            | 58.4(11.4)                    | 57.9(12.2)      | 0.938         |                       |
| Body mass index (kg/m <sup>2</sup> )  | 20.9(3.4)      | 21.1(3.3)                    | 20.8(3.3)       | 20.8(3.5)     | 0.766                 | 20.8(3.7)             | 21.0(2.9)                     | 21.0(3.4)       | 0.841         |                       |
| Education (n, %)                      |                |                              |                 |               |                       |                       |                               |                 |               |                       |
| College or less                       | 117(28.1)      | 35(23.5)                     | 37(27.0)        | 45(34.4)      | 0.123                 | 38(23.5)              | 34(28.1)                      | 45(33.6)        | 0.155         |                       |
| Bachelor or more                      | 300(71.9)      | 114(76.5)                    | 101(73.0)       | 87(65.7)      |                       | 124(76.5)             | 87(71.9)                      | 89(66.4)        |               |                       |
| Marriage (n, %)                       |                |                              |                 |               |                       |                       |                               |                 |               |                       |
| Married or other                      | 235(56.4)      | 67(45.0)                     | 70(51.1)        | 45(34.4)      | 0.020                 | 83(51.2)              | 53(43.8)                      | 46(34.3)        | 0.014         |                       |
| Unmarried                             | 182(43.7)      | 82(55.0)                     | 67(48.9)        | 86(65.7)      |                       | 79(48.8)              | 68(56.2)                      | 88(65.7)        |               |                       |
| Neck injury (n, %)                    | 14(3.4)        | 1(0.7)                       | 5(3.7)          | 8(6.1)        | 0.028                 | -                     | -                             | -               | -             |                       |
| Low back injury (n, %)                | -              | -                            | -               | -             | -                     | 6(3.7)                | 11(9.1)                       | 20(14.9)        | 0.003         |                       |
| <i>Work related variables:</i>        |                |                              |                 |               |                       |                       |                               |                 |               |                       |
| Work years (n, %)                     |                |                              |                 |               |                       |                       |                               |                 |               |                       |
| <5 years                              | 204(48.9)      | 80(53.7)                     | 70(51.1)        | 54(41.2)      | 0.094                 | 88(54.3)              | 60(49.6)                      | 56(41.8)        | 0.098         |                       |
| ≥5 years                              | 213(51.1)      | 69(46.3)                     | 67(48.9)        | 77(58.8)      |                       | 74(45.7)              | 61(50.4)                      | 78(58.2)        |               |                       |
| Office temperature (n, %)             |                |                              |                 |               |                       |                       |                               |                 |               |                       |
| Cold                                  | 52(12.5)       | 12(8.1)                      | 16(11.7)        | 24(18.3)      | 0.033                 | 9(5.6)                | 16(13.2)                      | 27(20.2)        | 0.001         |                       |
| Median or hot                         | 365(87.5)      | 137(92.0)                    | 121(88.3)       | 107(81.7)     |                       | 153(94.4)             | 105(86.8)                     | 107(79.9)       |               |                       |
| Location of computer displayer (n, %) |                |                              |                 |               |                       |                       |                               |                 |               |                       |
| In front                              | 265(63.6)      | 105(70.5)                    | 86(62.8)        | 74(56.5)      | 0.051                 | 113(69.8)             | 81(66.9)                      | 71(53.0)        | 0.008         |                       |
| Not in front                          | 152(36.5)      | 44(29.5)                     | 52(37.2)        | 57(43.5)      |                       | 49(30.3)              | 40(33.1)                      | 63(47.0)        |               |                       |
| Computer-using time (n, %)            |                |                              |                 |               |                       |                       |                               |                 |               |                       |
| <8 hours                              | 203(48.7)      | 80(53.7)                     | 62(45.3)        | 61(46.6)      | 0.305                 | 86(53.1)              | 55(45.5)                      | 62(46.3)        | 0.354         |                       |
| ≥8 hours                              | 214(51.3)      | 69(46.3)                     | 75(54.7)        | 70(53.4)      |                       | 76(46.9)              | 66(54.6)                      | 72(53.7)        |               |                       |

# Pearson Chi-square test for categorical variables, ANOVA for continuous variables, or Fisher's exact test for categorical variables if the number of cells was < 5.

Table 2 Multinomial logistic regression models for correlates of neck pain

| Variables/NPQ <sup>#</sup>            | Low  | Medium          |                    |                | High            |                    |                | <i>p</i> value for trend <sup>‡</sup> |
|---------------------------------------|------|-----------------|--------------------|----------------|-----------------|--------------------|----------------|---------------------------------------|
|                                       |      | OR <sup>†</sup> | 95%CI <sup>†</sup> | <i>p</i> value | OR <sup>†</sup> | 95%CI <sup>†</sup> | <i>p</i> value |                                       |
| <i>Total participants:</i>            |      |                 |                    |                |                 |                    |                |                                       |
| Age (yrs)                             | Ref. | 0.97            | 0.92-1.02          | 0.18           | 0.99            | 0.94-1.04          | 0.768          | 0.541                                 |
| BMI <sup>†</sup> (kg/m <sup>2</sup> ) | Ref. | 1.01            | 0.93-1.10          | 0.80           | 1.01            | 0.92-1.10          | 0.901          | 0.868                                 |
| Male                                  | Ref. | 0.60            | 0.35-1.03          | 0.06           | <b>0.36</b>     | <b>0.20-0.64</b>   | <b>0.001</b>   | <b>0.000</b>                          |
| Bachelor or more                      | Ref. | 0.90            | 0.52-1.58          | 0.72           | 0.69            | 0.39-1.22          | 0.201          | 0.344                                 |
| Married                               | Ref. | 0.66            | 0.35-1.26          | 0.21           | 1.20            | 0.61-2.36          | 0.604          | 0.425                                 |
| Neck injury                           | Ref. | 7.88            | 0.85-73.31         | 0.07           | <b>9.61</b>     | <b>1.06-87.52</b>  | <b>0.045</b>   | <b>0.006</b>                          |
| Work years ≥5 yrs                     | Ref. | <b>2.01</b>     | <b>1.04-3.88</b>   | <b>0.04</b>    | 1.76            | 0.88-3.53          | 0.110          | 0.088                                 |
| Cold office temperature               | Ref. | 1.05            | 0.46-2.38          | 0.92           | 1.87            | 0.85-4.14          | 0.122          | <b>0.011</b>                          |
| Computer displayer not in front       | Ref. | 1.41            | 0.84-2.35          | 0.19           | <b>1.99</b>     | <b>1.17-3.40</b>   | <b>0.011</b>   | <b>0.001</b>                          |
| Computer use ≥8 h/d                   | Ref. | 1.27            | 0.78-2.06          | 0.35           | 1.02            | 0.61-1.70          | 0.956          | 0.561                                 |
| <i>Male:</i>                          |      |                 |                    |                |                 |                    |                |                                       |
| Age (yrs)                             | Ref. | 1.02            | 0.95-1.09          | 0.631          | 0.95            | 0.88-1.03          | 0.183          | 0.649                                 |
| BMI <sup>†</sup> (kg/m <sup>2</sup> ) | Ref. | 1.02            | 0.90-1.16          | 0.770          | 0.98            | 0.86-1.11          | 0.707          | 0.570                                 |
| Bachelor or more                      | Ref. | 1.51            | 0.62-3.66          | 0.360          | 0.62            | 0.25-1.56          | 0.313          | 0.539                                 |
| Married                               | Ref. | 0.52            | 0.19-1.43          | 0.206          | 1.02            | 0.34-3.06          | 0.974          | 0.574                                 |
| Neck injury                           | Ref. | 7.51            | 0.74-75.67         | 0.087          | 7.98            | 0.67-94.35         | 0.100          | <b>0.013</b>                          |
| Work years ≥5 yrs                     | Ref. | 1.15            | 0.42-8.30          | 0.783          | 2.67            | 0.87-8.19          | 0.087          | 0.140                                 |
| Cold office temperature               | Ref. | 2.02            | 0.49-8.30          | 0.332          | 1.12            | 0.21-5.86          | 0.898          | 0.791                                 |
| Computer displayer not in front       | Ref. | 0.66            | 0.30-1.47          | 0.311          | 1.43            | 0.60-3.39          | 0.416          | 0.281                                 |
| Computer use ≥8 h/d                   | Ref. | 1.24            | 0.59-2.60          | 0.573          | 0.53            | 0.22-1.30          | 0.168          | 0.078                                 |
| <i>Female*:</i>                       |      |                 |                    |                |                 |                    |                |                                       |
| Age (yrs)                             | Ref. | 0.94            | 0.86-1.02          | 0.112          | 1.03            | 0.95-1.11          | 0.509          | 0.150                                 |
| BMI <sup>†</sup> (kg/m <sup>2</sup> ) | Ref. | 1.01            | 0.90-1.13          | 0.889          | 1.03            | 0.91-1.16          | 0.673          | 0.420                                 |
| Bachelor or more                      | Ref. | 0.66            | 0.31-1.43          | 0.295          | 0.58            | 0.27-1.26          | 0.169          | 0.365                                 |
| Married                               | Ref. | 0.81            | 0.34-1.97          | 0.645          | 1.41            | 0.58-3.44          | 0.447          | 0.168                                 |
| Work years ≥5 yrs                     | Ref. | <b>2.71</b>     | <b>1.05-6.96</b>   | <b>0.039</b>   | 1.52            | 0.59-3.93          | 0.385          | 0.378                                 |
| Cold office temperature               | Ref. | 0.79            | 0.28-2.24          | 0.653          | 2.06            | 0.80-5.31          | 0.135          | <b>0.010</b>                          |
| Computer displayer not in front       | Ref. | <b>2.59</b>     | <b>1.26-5.34</b>   | <b>0.010</b>   | <b>2.94</b>     | <b>1.41-6.11</b>   | <b>0.004</b>   | <b>0.001</b>                          |
| Computer use ≥8 h/d                   | Ref. | 1.39            | 0.70-2.66          | 0.356          | 1.36            | 0.70-2.67          | 0.367          | 0.714                                 |

# Northwick Park Neck Pain Questionnaire. \* The variable of neck injury was excluded from the female regression model because there were no participants in the low NPQ tertile. † OR, odds ratio; CI, confidence interval; BMI, body mass index. ‡ The *p* values for trend were obtained from multiple linear regression models.



Table 3 Multinomial logistic regression models for correlates of low back pain

| Variables/ODI <sup>#</sup>            | Low  | Medium          |                    |                | High            |                    |                | <i>p</i> value for trend <sup>‡</sup> |
|---------------------------------------|------|-----------------|--------------------|----------------|-----------------|--------------------|----------------|---------------------------------------|
|                                       |      | OR <sup>†</sup> | 95%CI <sup>†</sup> | <i>p</i> value | OR <sup>†</sup> | 95%CI <sup>†</sup> | <i>p</i> value |                                       |
| <i>Total participants:</i>            |      |                 |                    |                |                 |                    |                |                                       |
| Age (yrs)                             | Ref. | 0.95            | 0.90-1.00          | 0.067          | 1.01            | 0.96-1.06          | 0.848          | 0.740                                 |
| BMI <sup>†</sup> (kg/m <sup>2</sup> ) | Ref. | 1.04            | 0.95-1.14          | 0.377          | 1.01            | 0.92-1.10          | 0.858          | 0.269                                 |
| Male                                  | Ref. | 0.72            | 0.42-1.25          | 0.239          | 0.59            | 0.34-1.04          | 0.066          | 0.241                                 |
| Bachelor or more                      | Ref. | 0.77            | 0.44-1.35          | 0.362          | 0.64            | 0.37-1.12          | 0.122          | 0.626                                 |
| Married                               | Ref. | 1.65            | 0.86-3.16          | 0.129          | <b>2.08</b>     | <b>1.06-4.08</b>   | <b>0.034</b>   | <b>0.000</b>                          |
| Low back injury                       | Ref. | 2.12            | 0.73-6.20          | 0.169          | <b>4.36</b>     | <b>1.65-11.71</b>  | <b>0.003</b>   | <b>0.000</b>                          |
| Work years ≥5 yrs                     | Ref. | 1.21            | 0.63-2.35          | 0.568          | 1.06            | 0.53-2.11          | 0.871          | 0.264                                 |
| Cold office temperature               | Ref. | <b>2.43</b>     | <b>1.02-5.79</b>   | <b>0.045</b>   | <b>4.17</b>     | <b>1.82-9.57</b>   | <b>0.001</b>   | <b>0.000</b>                          |
| Computer displayer not in front       | Ref. | 1.05            | 0.62-1.77          | 0.867          | <b>2.05</b>     | <b>1.22-3.44</b>   | <b>0.007</b>   | <b>0.005</b>                          |
| Computer use ≥8 h/d                   | Ref. | 1.23            | 0.75-2.02          | 0.409          | 1.04            | 0.63-1.73          | 0.879          | 0.312                                 |
| <i>Male:</i>                          |      |                 |                    |                |                 |                    |                |                                       |
| Age (yrs)                             | Ref. | <b>0.91</b>     | <b>0.84-1.00</b>   | <b>0.045</b>   | 0.98            | 0.91-1.05          | 0.542          | 0.838                                 |
| BMI <sup>†</sup> (kg/m <sup>2</sup> ) | Ref. | 1.07            | 0.92-1.24          | 0.373          | 0.98            | 0.86-1.12          | 0.797          | 0.450                                 |
| Bachelor or more                      | Ref. | 0.63            | 0.25-1.59          | 0.326          | <b>0.39</b>     | <b>0.16-0.93</b>   | <b>0.034</b>   | 0.092                                 |
| Married                               | Ref. | 0.91            | 0.32-2.63          | 0.863          | 1.30            | 0.44-3.84          | 0.633          | 0.144                                 |
| Low back injury                       | Ref. | <b>7.24</b>     | <b>1.30-40.20</b>  | <b>0.024</b>   | <b>5.78</b>     | <b>1.07-31.07</b>  | <b>0.041</b>   | 0.053                                 |
| Work years ≥5 yrs                     | Ref. | 2.74            | 0.95-7.86          | 0.062          | 2.33            | 0.78-7.00          | 0.132          | 0.203                                 |
| Cold office temperature               | Ref. | 1.45            | 0.33-6.50          | 0.624          | 2.14            | 0.53-8.65          | 0.286          | 0.629                                 |
| Computer displayer not in front       | Ref. | 0.44            | 0.18-1.09          | 0.077          | 1.29            | 0.57-2.92          | 0.541          | 0.144                                 |
| Computer use ≥8 h/d                   | Ref. | 1.41            | 0.64-3.13          | 0.394          | 0.71            | 0.31-1.64          | 0.425          | 0.180                                 |
| <i>Female:</i>                        |      |                 |                    |                |                 |                    |                |                                       |
| Age (yrs)                             | Ref. | 0.98            | 0.91-1.05          | 0.501          | 1.03            | 0.96-1.10          | 0.438          | 0.574                                 |
| BMI <sup>†</sup> (kg/m <sup>2</sup> ) | Ref. | 1.03            | 0.92-1.15          | 0.669          | 1.03            | 0.91-1.16          | 0.626          | 0.476                                 |
| Bachelor or more                      | Ref. | 0.82            | 0.39-1.72          | 0.601          | 0.79            | 0.37-1.68          | 0.540          | 0.737                                 |
| Married                               | Ref. | <b>3.31</b>     | <b>1.34-8.16</b>   | <b>0.009</b>   | <b>3.50</b>     | <b>1.39-8.81</b>   | <b>0.008</b>   | <b>0.001</b>                          |
| Low back injury                       | Ref. | 0.92            | 0.19-4.60          | 0.921          | <b>4.21</b>     | <b>1.18-15.04</b>  | <b>0.027</b>   | <b>0.002</b>                          |
| Work years ≥5 yrs                     | Ref. | 0.61            | 0.24-1.54          | 0.292          | 0.57            | 0.22-1.46          | 0.240          | 0.594                                 |
| Cold office temperature               | Ref. | 2.88            | 0.92-8.98          | 0.069          | <b>5.35</b>     | <b>1.79-16.03</b>  | <b>0.003</b>   | <b>0.000</b>                          |
| Computer displayer not in front       | Ref. | 1.93            | 0.96-3.90          | 0.067          | <b>3.22</b>     | <b>1.58-6.54</b>   | <b>0.001</b>   | <b>0.016</b>                          |
| Computer use ≥8 h/d                   | Ref. | 1.08            | 0.56-2.09          | 0.816          | 1.13            | 0.57-2.23          | 0.732          | 0.499                                 |

<sup>#</sup> Oswestry low back pain disability index. <sup>†</sup> OR, odds ratio; CI, confidence interval; BMI, body mass index. <sup>‡</sup> The *p* values for trend were obtained from multiple linear regression models.

STROBE 2007 (v4) Statement—Checklist of items that should be included in reports of *cross-sectional studies*

| Section/Topic                | Item # | Recommendation                                                                                                                                                                       | Reported on page # |
|------------------------------|--------|--------------------------------------------------------------------------------------------------------------------------------------------------------------------------------------|--------------------|
| Title and abstract           | 1      | (a) Indicate the study's design with a commonly used term in the title or the abstract                                                                                               | 2                  |
|                              |        | (b) Provide in the abstract an informative and balanced summary of what was done and what was found                                                                                  | 2                  |
| <b>Introduction</b>          |        |                                                                                                                                                                                      |                    |
| Background/rationale         | 2      | Explain the scientific background and rationale for the investigation being reported                                                                                                 | 4                  |
| Objectives                   | 3      | State specific objectives, including any prespecified hypotheses                                                                                                                     | 4                  |
| <b>Methods</b>               |        |                                                                                                                                                                                      |                    |
| Study design                 | 4      | Present key elements of study design early in the paper                                                                                                                              | 5                  |
| Setting                      | 5      | Describe the setting, locations, and relevant dates, including periods of recruitment, exposure, follow-up, and data collection                                                      | 5                  |
| Participants                 | 6      | (a) Give the eligibility criteria, and the sources and methods of selection of participants                                                                                          | 5                  |
| Variables                    | 7      | Clearly define all outcomes, exposures, predictors, potential confounders, and effect modifiers. Give diagnostic criteria, if applicable                                             | 5                  |
| Data sources/<br>measurement | 8*     | For each variable of interest, give sources of data and details of methods of assessment (measurement). Describe comparability of assessment methods if there is more than one group | 5                  |
| Bias                         | 9      | Describe any efforts to address potential sources of bias                                                                                                                            | 5-6                |
| Study size                   | 10     | Explain how the study size was arrived at                                                                                                                                            | 5                  |
| Quantitative variables       | 11     | Explain how quantitative variables were handled in the analyses. If applicable, describe which groupings were chosen and why                                                         | 5                  |
| Statistical methods          | 12     | (a) Describe all statistical methods, including those used to control for confounding                                                                                                | 5-6                |
|                              |        | (b) Describe any methods used to examine subgroups and interactions                                                                                                                  | 5-6                |
|                              |        | (c) Explain how missing data were addressed                                                                                                                                          | 5-6                |
|                              |        | (d) If applicable, describe analytical methods taking account of sampling strategy                                                                                                   | 5-6                |
|                              |        | (e) Describe any sensitivity analyses                                                                                                                                                | 5-6                |
| <b>Results</b>               |        |                                                                                                                                                                                      |                    |

|                          |     |                                                                                                                                                                                                              |      |
|--------------------------|-----|--------------------------------------------------------------------------------------------------------------------------------------------------------------------------------------------------------------|------|
| Participants             | 13* | (a) Report numbers of individuals at each stage of study—eg numbers potentially eligible, examined for eligibility, confirmed eligible, included in the study, completing follow-up, and analysed            | 6    |
|                          |     | (b) Give reasons for non-participation at each stage                                                                                                                                                         | 5    |
|                          |     | (c) Consider use of a flow diagram                                                                                                                                                                           | ns   |
| Descriptive data         | 14* | (a) Give characteristics of study participants (eg demographic, clinical, social) and information on exposures and potential confounders                                                                     | 6-7  |
|                          |     | (b) Indicate number of participants with missing data for each variable of interest                                                                                                                          | 5    |
| Outcome data             | 15* | Report numbers of outcome events or summary measures                                                                                                                                                         | 6    |
| Main results             | 16  | (a) Give unadjusted estimates and, if applicable, confounder-adjusted estimates and their precision (eg, 95% confidence interval). Make clear which confounders were adjusted for and why they were included | 7-11 |
|                          |     | (b) Report category boundaries when continuous variables were categorized                                                                                                                                    | 5    |
|                          |     | (c) If relevant, consider translating estimates of relative risk into absolute risk for a meaningful time period                                                                                             | ns   |
| Other analyses           | 17  | Report other analyses done—eg analyses of subgroups and interactions, and sensitivity analyses                                                                                                               | 10   |
| <b>Discussion</b>        |     |                                                                                                                                                                                                              |      |
| Key results              | 18  | Summarise key results with reference to study objectives                                                                                                                                                     | 11   |
| Limitations              | 19  | Discuss limitations of the study, taking into account sources of potential bias or imprecision. Discuss both direction and magnitude of any potential bias                                                   | 13   |
| Interpretation           | 20  | Give a cautious overall interpretation of results considering objectives, limitations, multiplicity of analyses, results from similar studies, and other relevant evidence                                   | 11   |
| Generalisability         | 21  | Discuss the generalisability (external validity) of the study results                                                                                                                                        | 13   |
| <b>Other information</b> |     |                                                                                                                                                                                                              |      |
| Funding                  | 22  | Give the source of funding and the role of the funders for the present study and, if applicable, for the original study on which the present article is based                                                | 14   |

\*Give information separately for cases and controls in case-control studies and, if applicable, for exposed and unexposed groups in cohort and cross-sectional studies.

**Note:** An Explanation and Elaboration article discusses each checklist item and gives methodological background and published examples of transparent reporting. The STROBE checklist is best used in conjunction with this article (freely available on the Web sites of PLoS Medicine at <http://www.plosmedicine.org/>, Annals of Internal Medicine at <http://www.annals.org/>, and Epidemiology at <http://www.epidem.com/>). Information on the STROBE Initiative is available at [www.strobe-statement.org](http://www.strobe-statement.org).

# BMJ Open

## Risk factors of non-specific neck pain and low back pain in computer-using office workers in China: a cross-sectional study

|                                 |                                                                                                                                                                                                                                                                                     |
|---------------------------------|-------------------------------------------------------------------------------------------------------------------------------------------------------------------------------------------------------------------------------------------------------------------------------------|
| Journal:                        | <i>BMJ Open</i>                                                                                                                                                                                                                                                                     |
| Manuscript ID                   | bmjopen-2016-014914.R2                                                                                                                                                                                                                                                              |
| Article Type:                   | Research                                                                                                                                                                                                                                                                            |
| Date Submitted by the Author:   | 14-Mar-2017                                                                                                                                                                                                                                                                         |
| Complete List of Authors:       | Ye, Sunyue; Zhejiang University; Zhejiang Financial College<br>Jing, Qinglei; Zhejiang Financial College, Physical Activity and Health Research Institute<br>Wei, Chen; Zhejiang University<br>Lu, Jie; Zhejiang Financial College, Physical Activity and Health Research Institute |
| <b>Primary Subject Heading</b>: | Occupational and environmental medicine                                                                                                                                                                                                                                             |
| Secondary Subject Heading:      | Public health, Epidemiology                                                                                                                                                                                                                                                         |
| Keywords:                       | Risk management < HEALTH SERVICES ADMINISTRATION & MANAGEMENT, Back pain < ORTHOPAEDIC & TRAUMA SURGERY, EPIDEMIOLOGY, PUBLIC HEALTH, Spine < ORTHOPAEDIC & TRAUMA SURGERY                                                                                                          |
|                                 |                                                                                                                                                                                                                                                                                     |

SCHOLARONE™  
Manuscripts

Only

1  
2  
3 **Risk factors of non-specific neck pain and low back pain in**  
4  
5  
6 **computer-using office workers in China: a cross-sectional**  
7  
8 **study**  
9  
10

11  
12  
13  
14 Sunyue Ye<sup>1,2\*</sup>, Qinglei Jing<sup>2</sup>, Chen Wei<sup>1,3</sup>, Jie Lu<sup>2</sup>  
15

16  
17 1. Chronic Disease Research Institute, Zhejiang University School of Public Health,  
18 Hangzhou, China, 310058.  
19

20  
21 2. Physical Activity and Health Research Institute, Zhejiang Financial College,  
22 Hangzhou, China, 310018.  
23

24  
25 3. Stanford Prevention Research Center, School of Medicine, Stanford University, CA,  
26 United States, 94305.  
27  
28  
29

30  
31  
32  
33 **\* Corresponding Author:**  
34

35 Sunyue Ye, PhD  
36

37  
38 Chronic Disease Research Institute and Department of Nutrition and Food Hygiene,  
39 Zhejiang University School of Public Health,  
40

41  
42 866 Yu-hang-tang Road, Hangzhou, Zhejiang 310058 China.  
43

44  
45 Tel: (+86) 571-8820-8591 or (+86) 135-8811-5849  
46

47 E-mail: [yesunyue@zju.edu.cn](mailto:yesunyue@zju.edu.cn)  
48  
49  
50  
51  
52  
53  
54  
55  
56  
57  
58  
59  
60

## Abstract

**Objectives:** Several studies have found that inappropriate workstations are associated with musculoskeletal disorders. The present cross-sectional study aimed to identify the risk factors of non-specific neck pain (NP) and low back pain (LBP) among computer-using workers. **Design:** Observational study with a cross-sectional sample. **Setting:** This study surveyed 15 companies in Zhejiang province, China. **Participants:** After excluding participants with missing variables, 417 office workers, including 163 men and 254 women, were analyzed. **Outcome measures:** Demographic information was collected by self-report. The standard Northwick Park Neck Pain Questionnaire and Oswestry Low Back Pain Disability Index, along with other relevant questions, were used to assess the presence of potential occupational risk factors and the perceived levels of pain. Multinomial logistic regression analysis, adjusted for age, sex, body mass index, education, marital status, and neck/low back injury, was performed to identify significant risk factors. **Results:** Compared with low-level NP, the computer location (monitor not in front) was associated with odds ratios (ORs) of 2.6 and 2.9 for medium- and high-level NP, respectively. For LBP, the computer location (monitor not in front) was associated with an OR of 3.2 for high-level pain, as compared with low-level pain, in females. Significant associations were also observed between the office temperature and LBP (OR: 5.4 for high vs. low), and between office work  $\geq 5$  years and NP in female office workers (OR: 2.7 for medium vs. low). **Conclusions:** Not having the computer monitor located in front was found to be an important risk factor of NP and LBP in computer-using female workers. This information may not only enable the development of potential preventive strategies but may also provide new insights for designing appropriate workstations.

**Strengths and limitations of this study:**

- This is the first study on the associations of the horizontal location of the computer monitor with neck pain and low back pain in Chinese computer users.
- However, most participants were young and recruited via the identification of college alumni, limiting the generalizability of our findings.
- Further, this study did not explore the relationships between the exact angle of the computer monitor location and neck pain/low back pain based on objective measurements.

**Keywords:** Low back disorder; Computer use; Musculoskeletal pain; White-collar worker; Self-reported questionnaire.

## Introduction

Non-specific neck pain (NP) and low back pain (LBP) are highly common musculoskeletal disorders and the leading causes of disability worldwide[1]. It has been well established that NP and LBP are not only risk factors of severe spine problems and functional disability, but that they are also associated with decreased quality of life and productivity of workers[2]. Of note, although NP and LBP are musculoskeletal conditions affecting different body parts, they generally have similar symptoms, hazards, and etiology[3].

The risk factors of NP or LBP are commonly multidimensional, including muscular, skeletal, and nervous system-related factors. Further, they can be both modifiable and non-modifiable, and can be divided into individual and occupational factors. Individual factors related to NP and/or LBP include, among others, sex, age, history of neck/low back injury, and psychological factors (e.g., mental stress, anxiety, depression, and lack of social support) [4 5]. In addition, some studies have also indicated that occupational factors, including prolonged sedentary or office work hours, high work load/demands, and inappropriate workstation designs, are associated with NP and/or LBP [6-8].

Sedentary or office workers in schools, hospitals, and the military have been observed to have high incidences and prevalence of NP and LBP[9-11]. This might be caused by their prolonged sitting time and specific body postures, such as inappropriate neck or low back flexion or rotation, as well as other workplace environmental factors[12]. However, the current literature on modifiable determinants of NP/LBP among office workers in modern workplace environments, where intensive computer use is common, is insufficient[13]. Thus, the present study aimed



1  
2  
3 to explore the associations of occupational risk factors with NP and LBP in computer-  
4  
5 using office workers.  
6

## 7 **Methods**

### 8 *Participants*

9  
10 This cross-sectional study was conducted in 15 financial organizations in  
11  
12 Zhejiang, China. A total of 425 office workers, aged 18-59 years, were recruited and  
13  
14 investigated based on cluster sampling from September to December 2015, via the  
15  
16 identification of alumni of Zhejiang Financial College. All participants provided  
17  
18 informed consent before participating in the study. After excluding participants with  
19  
20 missing individual and/or occupational information (n=8), 417 participants were  
21  
22 included in the final analysis. The study was approved by the Institutional Review  
23  
24 Board of Zhejiang Financial College.  
25  
26  
27  
28

### 29 *Data collection and variable definitions*

30  
31 Data were collected using mailed questionnaires, which included the  
32  
33 Northwick Park Neck Pain Questionnaire (NPQ)[14] and the Oswestry Low Back  
34  
35 Pain Disability Index (ODI)[15] to measure NP and LBP, respectively[16]. In  
36  
37 addition, individual and demographic information, including sex, age, height, weight,  
38  
39 education, marital status, and history of general neck/low back injuries, was collected  
40  
41 by a questionnaire. Based on previous literature and a pre-survey, the potential  
42  
43 occupational risk factors (e.g., years of office work at current job, office temperature,  
44  
45 location of the computer monitor, and duration of computer use per day) were  
46  
47 determined by self-report. Participants with non-specific NP or LBP were defined by  
48  
49 a self-rated value of the NPQ or ODI of >0. Body mass index (BMI) was calculated as  
50  
51 the weight (kg) divided by the squared height (m<sup>2</sup>). All data were double-entered and  
52  
53 checked with Epidata 3.1.  
54  
55  
56  
57  
58  
59  
60

### *Statistical analysis*

First, we classified the values of the NPQ and ODI into tertiles (low:  $ODI < 0.19$  and  $NPQ < 0.25$ , medium:  $0.19 \leq ODI < 0.24$  and  $0.25 \leq NPQ < 0.34$ , and high:  $ODI \geq 0.24$  and  $NPQ \geq 0.34$ ). To test the differences in the categorical variables according to the NPQ or ODI results, the Chi-square test or Fisher's exact test was used if the cell number was  $< 5$ , while ANOVA was used for continuous variables. Independent associations of occupational variables with the NPQ or ODI tertiles were analyzed using multinomial logistic or linear regression models in the total participants and stratified by sex, because significant interactions between sex and the occupational variables were observed in the present study. The results are presented as odds ratios (ORs) with 95% confidence intervals (CIs). A sensitivity analysis was conducted by including participants with missing variables, encoded as the mean for continuous variables and mode for categorical variables. All statistical analyses were conducted with IBM SPSS 20.0 (IBM Corporation, New York, USA). Statistical significance was defined as  $p < 0.05$ .

### **Results**

The characteristics of the participants are shown in Table 1. The mean age was 29.1 ( $\pm 6.8$ ) years. The point prevalence rates of NP and LBP (mild to severe levels of pain) were 86.3% and 75.5%, respectively; 71.5% of participants reported both NP and LBP. The differences in sex, marital status, history of neck injury, and office temperature among the NPQ tertiles were significant ( $p < 0.05$ ). Similarly, the differences in marital status, history of low back injury, office temperature, and location of the computer monitor significantly differed among the ODI tertiles ( $p < 0.05$ ).

1  
2  
3 Table 2 shows the results of the multinomial logistic and linear regression  
4 analyses of individual and occupational factors related to NP. In the total participants,  
5 compared with the low NPQ tertile, office work  $\geq 5$  years, sex, history of neck injury,  
6 and having the computer monitor not located in front (i.e. on the right or left side of  
7 the operator) were significantly associated with the high NPQ tertile after adjusting  
8 for age, BMI, education, and marital status. Significant linear associations of NP (as a  
9 continuous variable) with female sex, neck injury, cold office temperature, and the  
10 computer monitor not located in front were also observed ( $p < 0.05$ ). Among the male  
11 participants, no significant associations were observed between occupational factors  
12 and the NPQ tertiles in the linear regression model, except for neck injury. In females,  
13 having the computer monitor not located in front and cold office temperature were  
14 significant risk factors for both the medium and high NPQ tertiles, while office work  
15  $\geq 5$  years (vs.  $< 5$  years) was a significant risk factor for the medium, but not the high,  
16 NPQ tertile ( $p > 0.05$ ).  
17  
18  
19  
20  
21  
22  
23  
24  
25  
26  
27  
28  
29  
30  
31  
32  
33

34 The results of the multinomial logistic and linear regression analyses for LBP  
35 are presented in Table 3. In the total participants, compared with the low ODI tertile,  
36 married status, history of low back injury, cold office temperature, and the computer  
37 monitor not located in front were significant risk factors for LBP after adjusting for  
38 age, BMI, sex, and education. In males, age, history of low back injury, and education  
39 were significant risk factors for LBP, while no significant associations were observed  
40 between occupational factors and the ODI tertiles. In females, married status, low  
41 back injury, cold office temperature, and not having the computer monitor in front  
42 were significantly related to higher levels of LBP. Additionally, the results showed no  
43 significant differences between the included and excluded participants with missing  
44 variables.  
45  
46  
47  
48  
49  
50  
51  
52  
53  
54  
55  
56  
57  
58  
59  
60

## Discussion

In the present study, having the computer monitor not located in front (i.e. on the right or left side), cold office temperature, and office work  $\geq 5$  years were significantly associated with non-specific NP and/or LBP after controlling for age, BMI, sex, education, marital status, and history of neck/low back injury. These results may have significance for developing prevention or intervention strategies against non-specific NP and LBP in computer-using office workers.

Previous researches on the associations of specific adjustable behavioral or occupational factors among intensive computer-using office workers with non-specific NP/LBP are scarce, although epidemiological evidence of a correlation between computer-using time and NP/LBP has been well established [6 17 18]. A few studies have indicated that psychosocial stress, long work hours, poor social support, and neck/low back flexion/bending in the workplace might be occupational risk factors[7 8 12]. Paksaichol et al. indicated that improper height (vertical level) of computer monitors might be an indirect risk factor associated with NP[19]. However, to our knowledge, few studies have indicated that the location of the computer monitor (horizontal level) is an important risk factor of non-specific NP/LBP. Prolonged and repeated body trunk over-rotation/flexion might cause non-specific NP/LBP by damaging the musculoskeletal system of the neck or low back[20 21], as the individual needs to turn around to face the computer monitor if it is not located directly in front. Especially, many workstations in various organizations and companies are multifaceted, requiring the office workers or operators to rotate their body/trunk continuously while working. These results provide a direction for future workstation designs in related industries.

1  
2  
3 In addition, it has been well established that cold stimulation is a risk factor of  
4 musculoskeletal pain[22-24]. Our study also found that there was an association  
5 between cold office temperature and non-specific NP and LBP, providing further  
6 evidence for this possible causal relationship. However, there might be reciprocal  
7 causation between these two variables, with individuals with NP and LBP potentially  
8 being much more susceptible to cold environments (lower office temperature) or  
9 experiencing enhanced perceived pain via their sensory nerves[25]. Conversely, it can  
10 be speculated that a warm office temperature might be associated with less non-  
11 specific NP and LBP among intensive computer users or sedentary workers.  
12  
13  
14  
15  
16  
17  
18  
19  
20  
21  
22

23 In this study, we further found that longer work years and injuries of the  
24 neck/low back were associated with both non-specific NP and LBP, as were female  
25 sex and married status. These results are consistent with those of previous studies[6-8].  
26 Women are known to have a higher prevalence of NP/LBP and to be more susceptible  
27 to environmental risk factors than men. This might be due to their physical inactivity,  
28 lower bone mineral density, and specific anatomical structure [26-28]. The reason  
29 why BMI, education, and computer-using time were not significantly associated with  
30 NP/LBP may be because of the narrow distribution of these variables in our limited  
31 study sample. Our participants were younger (85% of the participants were aged <35  
32 years) than the general industrial workers in China, and it is difficult to determine  
33 whether there is statistical significance based on variables with such a narrow  
34 distribution.  
35  
36  
37  
38  
39  
40  
41  
42  
43  
44  
45  
46  
47  
48

49 There were some limitations in this study that need to be acknowledged. Due  
50 to the cross-sectional design of the study and the relative small sample size, we were  
51 unable to detect the causality and other potential risk factors. Meanwhile, as  
52 mentioned above, most participants were young and comprised intensive computer  
53  
54  
55  
56  
57  
58  
59  
60

1  
2  
3 users and financial office workers. Thus, care must be taken when generalizing our  
4  
5 results to other populations. Lastly, the use of a self-reported questionnaire might  
6  
7 generate systematic bias. However, although physical factors can be assessed  
8  
9 objectively, most previous studies used self-reported questionnaires for measuring  
10  
11 non-specific pain and individual or environmental factors[5 7 8 29]. Nevertheless, in  
12  
13 this study, we assessed and verified the significance of various occupational and  
14  
15 environmental risk factors, including the location of the computer monitor and the  
16  
17 office temperature, for non-specific NP/LBP. These findings are important for  
18  
19 modern office workers, especially for those who are intensive computer users.  
20  
21

## 22 23 **Conclusions**

24  
25 Having the computer monitor located not in front (i.e. on the left or right side)  
26  
27 of the operator and cold office temperature are modifiable occupational risk factors of  
28  
29 non-specific NP and LBP in computer-using office workers. Additionally, a history of  
30  
31 neck/low back injury, longer office work years, female sex, and married status were  
32  
33 also identified as important occupational or individual factors associated with  
34  
35 NP/LBP. Accordingly, our results indicate that ensuring proper horizontal position of  
36  
37 the computer monitor and maintaining a relative warm office environment are  
38  
39 important for preventing NP and LBP, especially in neck- and/or back-injured female  
40  
41 office workers with intensive computer use. Further prospective studies using  
42  
43 objective measurements of work-related body posture and repetitiveness are required  
44  
45 to confirm our findings.  
46  
47  
48  
49  
50  
51

## 52 53 **Acknowledgements**

54  
55 We would like to thank Jingxia Fan, Lengyu Guo, Jinghao Zhang, Jiayi Zhou,  
56  
57 Zhuoyuan Zhao, Ze Yu, Binbin Dong, Haiou Miao, Yanbo Cen, Luna Xu, Yan Quan,  
58  
59  
60

1  
2  
3 Tingting Wu, Jie Chen, Lina Zhang, and Sheng Chen for data collection, and Editage  
4  
5 [www.editage.cn] for English language editing.  
6

7  
8 **Contributors:** SY Y designed and conducted the research and drafted the  
9  
10 manuscript. Q L J, C W and J L contributed to conduct the research and revised the  
11  
12 manuscript. SY Y analyzed data and had primary responsibility for final content. All  
13  
14 authors read and approved the final manuscript.  
15

16  
17 **Funding:** This study was supported by a grant from the Zhejiang Financial  
18  
19 Education Foundation (grant no.: 2014-19).  
20

21  
22 **Competing interests:** None declared.  
23

24  
25 **Data sharing statement:** No additional data are available.  
26  
27

## 28 29 **References:**

- 30  
31 1. Vassilaki M, Hurwitz EL. Insights in public health: perspectives on pain in the low  
32  
33 back and neck: global burden, epidemiology, and management. Hawai'i  
34  
35 journal of medicine & public health : a journal of Asia Pacific Medicine &  
36  
37 Public Health 2014;**73**(4):122-6  
38  
39
- 40 2. Matsudaira K, Kawaguchi M, Isomura T, et al. Assessment of psychosocial risk  
41  
42 factors for the development of non-specific chronic disabling low back pain in  
43  
44 Japanese workers-findings from the Japan Epidemiological Research of  
45  
46 Occupation-related Back Pain (JOB) study. Industrial health 2015;**53**(4):368-  
47  
48 77 doi: 10.2486/indhealth.2014-0260[published Online First: Epub Date]].  
49  
50
- 51 3. Mayer J, Kraus T, Ochsmann E. Longitudinal evidence for the association between  
52  
53 work-related physical exposures and neck and/or shoulder complaints: a  
54  
55 systematic review. International archives of occupational and environmental  
56  
57  
58  
59  
60

- 1  
2  
3 health 2012;**85**(6):587-603 doi: 10.1007/s00420-011-0701-0[published Online  
4  
5 First: Epub Date]].  
6
- 7 4. Kindler LL, Jones KD, Perrin N, Bennett RM. Risk factors predicting the  
8  
9 development of widespread pain from chronic back or neck pain. The journal  
10  
11 of pain : official journal of the American Pain Society 2010;**11**(12):1320-8 doi:  
12  
13 10.1016/j.jpain.2010.03.007[published Online First: Epub Date]].  
14  
15
- 16 5. Noormohammadpour P, Mansournia MA, Asadi-Lari M, Nourian R, Rostami M,  
17  
18 Kordi R. A Subtle Threat to Urban Populations in Developing Countries: Low  
19  
20 Back Pain and its Related Risk Factors. Spine 2016;**41**(7):618-27 doi:  
21  
22 10.1097/BRS.0000000000001269[published Online First: Epub Date]].  
23  
24
- 25 6. Paksaichol A, Janwantanakul P, Purepong N, Pensri P, van der Beek AJ. Office  
26  
27 workers' risk factors for the development of non-specific neck pain: a  
28  
29 systematic review of prospective cohort studies. Occupational and  
30  
31 environmental medicine 2012;**69**(9):610-8 doi: 10.1136/oemed-2011-  
32  
33 100459[published Online First: Epub Date]].  
34  
35
- 36 7. Yang H, Hitchcock E, Haldeman S, et al. Workplace psychosocial and  
37  
38 organizational factors for neck pain in workers in the United States. American  
39  
40 journal of industrial medicine 2016;**59**(7):549-60 doi:  
41  
42 10.1002/ajim.22602[published Online First: Epub Date]].  
43  
44
- 45 8. Yang H, Haldeman S, Nakata A, Choi B, Delp L, Baker D. Work-related risk  
46  
47 factors for neck pain in the US working population. Spine 2015;**40**(3):184-92  
48  
49 doi: 10.1097/BRS.0000000000000700[published Online First: Epub Date]].  
50  
51
- 52 9. Chiu TT, Lam PK. The prevalence of and risk factors for neck pain and upper limb  
53  
54 pain among secondary school teachers in Hong Kong. Journal of occupational  
55  
56  
57  
58  
59  
60



- 1  
2  
3 rehabilitation 2007;**17**(1):19-32 doi: 10.1007/s10926-006-9046-z[published  
4  
5 Online First: Epub Date]].  
6  
7  
8 10. De Loose V, Burnotte F, Cagnie B, Stevens V, Van Tiggelen D. Prevalence and  
9  
10 risk factors of neck pain in military office workers. *Military medicine*  
11  
12 2008;**173**(5):474-9  
13  
14 11. Erick PN, Smith DR. Low back pain among school teachers in Botswana,  
15  
16 prevalence and risk factors. *BMC musculoskeletal disorders* 2014;**15**:359 doi:  
17  
18 10.1186/1471-2474-15-359[published Online First: Epub Date]].  
19  
20  
21 12. Yue P, Liu F, Li L. Neck/shoulder pain and low back pain among school teachers  
22  
23 in China, prevalence and risk factors. *BMC public health* 2012;**12**:789 doi:  
24  
25 10.1186/1471-2458-12-789[published Online First: Epub Date]].  
26  
27  
28 13. McLean SM, May S, Klaber-Moffett J, Sharp DM, Gardiner E. Risk factors for  
29  
30 the onset of non-specific neck pain: a systematic review. *Journal of*  
31  
32 *epidemiology and community health* 2010;**64**(7):565-72 doi:  
33  
34 10.1136/jech.2009.090720[published Online First: Epub Date]].  
35  
36  
37 14. Sim J, Jordan K, Lewis M, Hill J, Hay EM, Dziedzic K. Sensitivity to change and  
38  
39 internal consistency of the Northwick Park Neck Pain Questionnaire and  
40  
41 derivation of a minimal clinically important difference. *The Clinical journal of*  
42  
43 *pain* 2006;**22**(9):820-6 doi: 10.1097/01.ajp.0000210937.58439.39[published  
44  
45 Online First: Epub Date]].  
46  
47  
48 15. Sheahan PJ, Nelson-Wong EJ, Fischer SL. A review of culturally adapted  
49  
50 versions of the Oswestry Disability Index: the adaptation process, construct  
51  
52 validity, test-retest reliability and internal consistency. *Disability and*  
53  
54 *rehabilitation* 2015:1-8 doi: 10.3109/09638288.2015.1019647[published  
55  
56 Online First: Epub Date]].  
57  
58  
59  
60

- 1  
2  
3 16. Murphy DR, Lopez M. Neck and back pain specific outcome assessment  
4  
5 questionnaires in the Spanish language: a systematic literature review. The  
6  
7 spine journal : official journal of the North American Spine Society  
8  
9 2013;**13**(11):1667-74 doi: 10.1016/j.spinee.2013.08.046[published Online  
10  
11 First: Epub Date]].  
12  
13  
14 17. Korhonen T, Ketola R, Toivonen R, Luukkonen R, Hakkanen M, Viikari-Juntura  
15  
16 E. Work related and individual predictors for incident neck pain among office  
17  
18 employees working with video display units. Occupational and environmental  
19  
20 medicine 2003;**60**(7):475-82  
21  
22  
23 18. Shete KM, Suryawanshi P, Gandhi N. Management of low back pain in computer  
24  
25 users: A multidisciplinary approach. Journal of craniovertebral junction &  
26  
27 spine 2012;**3**(1):7-10 doi: 10.4103/0974-8237.110117[published Online First:  
28  
29 Epub Date]].  
30  
31  
32 19. Paksaichol A, Lawsirirat C, Janwantanakul P. Contribution of biopsychosocial  
33  
34 risk factors to nonspecific neck pain in office workers: A path analysis model.  
35  
36 Journal of occupational health 2015;**57**(2):100-9 doi: 10.1539/joh.14-0124-  
37  
38 OA[published Online First: Epub Date]].  
39  
40  
41 20. Ambusam S, Baharudin O, Roslizawati N, Leonard J. Position of document holder  
42  
43 and work related risk factors for neck pain among computer users: a narrative  
44  
45 review. La Clinica terapeutica 2015;**166**(6):256-61 doi:  
46  
47 10.7417/CT.2015.1898[published Online First: Epub Date]].  
48  
49  
50 21. Hoogendoorn WE, Bongers PM, de Vet HC, et al. Flexion and rotation of the  
51  
52 trunk and lifting at work are risk factors for low back pain: results of a  
53  
54 prospective cohort study. Spine 2000;**25**(23):3087-92  
55  
56  
57  
58  
59  
60

- 1  
2  
3 22. Pienimaki T, Karppinen J, Rintamaki H, et al. Prevalence of cold-related  
4  
5 musculoskeletal pain according to self-reported threshold temperature among  
6  
7 the Finnish adult population. *European journal of pain* 2014;**18**(2):288-98 doi:  
8  
9 10.1002/j.1532-2149.2013.00368.x[published Online First: Epub Date]].  
10  
11  
12 23. Burstrom L, Jarvholm B, Nilsson T, Wahlstrom J. Back and neck pain due to  
13  
14 working in a cold environment: a cross-sectional study of male construction  
15  
16 workers. *International archives of occupational and environmental health*  
17  
18 2013;**86**(7):809-13 doi: 10.1007/s00420-012-0818-9[published Online First:  
19  
20 Epub Date]].  
21  
22  
23 24. Dovrat E, Katz-Leurer M. Cold exposure and low back pain in store workers in  
24  
25 Israel. *American journal of industrial medicine* 2007;**50**(8):626-31 doi:  
26  
27 10.1002/ajim.20488[published Online First: Epub Date]].  
28  
29  
30 25. Fernandes ES, Russell FA, Alawi KM, et al. Environmental cold exposure  
31  
32 increases blood flow and affects pain sensitivity in the knee joints of CFA-  
33  
34 induced arthritic mice in a TRPA1-dependent manner. *Arthritis research &*  
35  
36 *therapy* 2016;**18**:7 doi: 10.1186/s13075-015-0905-x[published Online First:  
37  
38 Epub Date]].  
39  
40  
41 26. Briggs AM, Straker LM, Burnett AF, Wark JD. Chronic low back pain is  
42  
43 associated with reduced vertebral bone mineral measures in community-  
44  
45 dwelling adults. *BMC musculoskeletal disorders* 2012;**13**:49 doi:  
46  
47 10.1186/1471-2474-13-49[published Online First: Epub Date]].  
48  
49  
50 27. Hiz O, Ediz L, Ercan S, Arslan M, Avcu S, Tekeoglu I. The Relationship Between  
51  
52 Chronic Low Back Pain and Bone Mineral Density in Young and Middle-  
53  
54 Aged Males. *Turk Fiz Tip Rehab D* 2012;**58**(4):294-98 doi:  
55  
56 10.4274/tftr.37267[published Online First: Epub Date]].  
57  
58  
59  
60

- 1  
2  
3 28. Muntner P, Gu D, Wildman RP, et al. Prevalence of physical activity among  
4  
5 Chinese adults: results from the International Collaborative Study of  
6  
7 Cardiovascular Disease in Asia. *American journal of public health*  
8  
9 2005;**95**(9):1631-6 doi: 10.2105/AJPH.2004.044743[published Online First:  
10  
11 Epub Date]].  
12  
13  
14 29. Sterud T, Tynes T. Work-related psychosocial and mechanical risk factors for low  
15  
16 back pain: a 3-year follow-up study of the general working population in  
17  
18 Norway. *Occupational and environmental medicine* 2013;**70**(5):296-302 doi:  
19  
20 10.1136/oemed-2012-101116[published Online First: Epub Date]].  
21  
22  
23  
24  
25  
26  
27  
28  
29  
30  
31  
32  
33  
34  
35  
36  
37  
38  
39  
40  
41  
42  
43  
44  
45  
46  
47  
48  
49  
50  
51  
52  
53  
54  
55  
56  
57  
58  
59  
60

Table 1 Characteristics of Chinese office workers stratified by the presence of neck pain or low back pain

| Variables                             | Total<br>n=417 | Northwick Park Questionnaire |                 |               |                       | <i>P</i> <sup>#</sup> | The Oswestry Disability Index |                 |               |                       |
|---------------------------------------|----------------|------------------------------|-----------------|---------------|-----------------------|-----------------------|-------------------------------|-----------------|---------------|-----------------------|
|                                       |                | Low<br>n=149                 | Medium<br>n=137 | High<br>n=131 | <i>P</i> <sup>#</sup> |                       | Low<br>n=162                  | Medium<br>n=121 | High<br>n=134 | <i>P</i> <sup>#</sup> |
| <i>Individual variables:</i>          |                |                              |                 |               |                       |                       |                               |                 |               |                       |
| Gender (n, %)                         |                |                              |                 |               |                       |                       |                               |                 |               |                       |
| Male                                  | 163(39.1)      | 74(49.7)                     | 53(38.7)        | 36(27.5)      | 0.001                 | 74(45.7)              | 45(37.2)                      | 44(32.8)        | 0.069         |                       |
| Female                                | 254(60.9)      | 75(50.3)                     | 84(61.3)        | 95(72.5)      |                       | 88(54.3)              | 76(62.8)                      | 90(67.2)        |               |                       |
| Age (years)                           | 29.1(6.8)      | 29.1(7.1)                    | 28.3(7.1)       | 30.0(6.0)     | 0.119                 | 28.8(7.4)             | 28.3(5.2)                     | 30.2(7.3)       | 0.062         |                       |
| Height (cm)                           | 165.9(11.1)    | 166.7(15.8)                  | 166.2(6.8)      | 164.6(7.7)    | 0.289                 | 165.9(15.1)           | 166.2(7.5)                    | 165.6(7.6)      | 0.907         |                       |
| Weight (kg)                           | 58.0(12.4)     | 59.3(13.4)                   | 57.7(11.2)      | 56.8(12.3)    | 0.236                 | 57.9(13.3)            | 58.4(11.4)                    | 57.9(12.2)      | 0.938         |                       |
| Body mass index (kg/m <sup>2</sup> )  | 20.9(3.4)      | 21.1(3.3)                    | 20.8(3.3)       | 20.8(3.5)     | 0.766                 | 20.8(3.7)             | 21.0(2.9)                     | 21.0(3.4)       | 0.841         |                       |
| Education (n, %)                      |                |                              |                 |               |                       |                       |                               |                 |               |                       |
| College or less                       | 117(28.1)      | 35(23.5)                     | 37(27.0)        | 45(34.4)      | 0.123                 | 38(23.5)              | 34(28.1)                      | 45(33.6)        | 0.155         |                       |
| Bachelor or more                      | 300(71.9)      | 114(76.5)                    | 101(73.0)       | 87(65.7)      |                       | 124(76.5)             | 87(71.9)                      | 89(66.4)        |               |                       |
| Marriage (n, %)                       |                |                              |                 |               |                       |                       |                               |                 |               |                       |
| Married or other                      | 235(56.4)      | 67(45.0)                     | 70(51.1)        | 45(34.4)      | 0.020                 | 83(51.2)              | 53(43.8)                      | 46(34.3)        | 0.014         |                       |
| Unmarried                             | 182(43.7)      | 82(55.0)                     | 67(48.9)        | 86(65.7)      |                       | 79(48.8)              | 68(56.2)                      | 88(65.7)        |               |                       |
| Neck injury (n, %)                    | 14(3.4)        | 1(0.7)                       | 5(3.7)          | 8(6.1)        | 0.028                 | -                     | -                             | -               | -             |                       |
| Low back injury (n, %)                | -              | -                            | -               | -             | -                     | 6(3.7)                | 11(9.1)                       | 20(14.9)        | 0.003         |                       |
| <i>Work related variables:</i>        |                |                              |                 |               |                       |                       |                               |                 |               |                       |
| Work years (n, %)                     |                |                              |                 |               |                       |                       |                               |                 |               |                       |
| <5 years                              | 204(48.9)      | 80(53.7)                     | 70(51.1)        | 54(41.2)      | 0.094                 | 88(54.3)              | 60(49.6)                      | 56(41.8)        | 0.098         |                       |
| ≥5 years                              | 213(51.1)      | 69(46.3)                     | 67(48.9)        | 77(58.8)      |                       | 74(45.7)              | 61(50.4)                      | 78(58.2)        |               |                       |
| Office temperature (n, %)             |                |                              |                 |               |                       |                       |                               |                 |               |                       |
| Cold                                  | 52(12.5)       | 12(8.1)                      | 16(11.7)        | 24(18.3)      | 0.033                 | 9(5.6)                | 16(13.2)                      | 27(20.2)        | 0.001         |                       |
| Median or hot                         | 365(87.5)      | 137(92.0)                    | 121(88.3)       | 107(81.7)     |                       | 153(94.4)             | 105(86.8)                     | 107(79.9)       |               |                       |
| Location of computer displayer (n, %) |                |                              |                 |               |                       |                       |                               |                 |               |                       |
| In front                              | 265(63.6)      | 105(70.5)                    | 86(62.8)        | 74(56.5)      | 0.051                 | 113(69.8)             | 81(66.9)                      | 71(53.0)        | 0.008         |                       |
| Not in front                          | 152(36.5)      | 44(29.5)                     | 52(37.2)        | 57(43.5)      |                       | 49(30.3)              | 40(33.1)                      | 63(47.0)        |               |                       |
| Computer-using time (n, %)            |                |                              |                 |               |                       |                       |                               |                 |               |                       |
| <8 hours                              | 203(48.7)      | 80(53.7)                     | 62(45.3)        | 61(46.6)      | 0.305                 | 86(53.1)              | 55(45.5)                      | 62(46.3)        | 0.354         |                       |
| ≥8 hours                              | 214(51.3)      | 69(46.3)                     | 75(54.7)        | 70(53.4)      |                       | 76(46.9)              | 66(54.6)                      | 72(53.7)        |               |                       |

# Pearson Chi-square test for categorical variables, ANOVA for continuous variables, or Fisher's exact test for categorical variables if the number of cells was <5.

Table 2 Multinomial logistic regression models for correlates of neck pain

| Variables/NPQ <sup>#</sup>            | Low  | Medium          |                    |                | High            |                    |                | <i>p</i> value for trend <sup>‡</sup> |
|---------------------------------------|------|-----------------|--------------------|----------------|-----------------|--------------------|----------------|---------------------------------------|
|                                       |      | OR <sup>†</sup> | 95%CI <sup>†</sup> | <i>p</i> value | OR <sup>†</sup> | 95%CI <sup>†</sup> | <i>p</i> value |                                       |
| <i>Total participants:</i>            |      |                 |                    |                |                 |                    |                |                                       |
| Age (yrs)                             | Ref. | 0.97            | 0.92-1.02          | 0.18           | 0.99            | 0.94-1.04          | 0.768          | 0.541                                 |
| BMI <sup>†</sup> (kg/m <sup>2</sup> ) | Ref. | 1.01            | 0.93-1.10          | 0.80           | 1.01            | 0.92-1.10          | 0.901          | 0.868                                 |
| Male                                  | Ref. | 0.60            | 0.35-1.03          | 0.06           | <b>0.36</b>     | <b>0.20-0.64</b>   | <b>0.001</b>   | <b>0.000</b>                          |
| Bachelor or more                      | Ref. | 0.90            | 0.52-1.58          | 0.72           | 0.69            | 0.39-1.22          | 0.201          | 0.344                                 |
| Married                               | Ref. | 0.66            | 0.35-1.26          | 0.21           | 1.20            | 0.61-2.36          | 0.604          | 0.425                                 |
| Neck injury                           | Ref. | 7.88            | 0.85-73.31         | 0.07           | <b>9.61</b>     | <b>1.06-87.52</b>  | <b>0.045</b>   | <b>0.006</b>                          |
| Work years ≥5 yrs                     | Ref. | <b>2.01</b>     | <b>1.04-3.88</b>   | <b>0.04</b>    | 1.76            | 0.88-3.53          | 0.110          | 0.088                                 |
| Cold office temperature               | Ref. | 1.05            | 0.46-2.38          | 0.92           | 1.87            | 0.85-4.14          | 0.122          | <b>0.011</b>                          |
| Computer displayer not in front       | Ref. | 1.41            | 0.84-2.35          | 0.19           | <b>1.99</b>     | <b>1.17-3.40</b>   | <b>0.011</b>   | <b>0.001</b>                          |
| Computer use ≥8 h/d                   | Ref. | 1.27            | 0.78-2.06          | 0.35           | 1.02            | 0.61-1.70          | 0.956          | 0.561                                 |
| <i>Male:</i>                          |      |                 |                    |                |                 |                    |                |                                       |
| Age (yrs)                             | Ref. | 1.02            | 0.95-1.09          | 0.631          | 0.95            | 0.88-1.03          | 0.183          | 0.649                                 |
| BMI <sup>†</sup> (kg/m <sup>2</sup> ) | Ref. | 1.02            | 0.90-1.16          | 0.770          | 0.98            | 0.86-1.11          | 0.707          | 0.570                                 |
| Bachelor or more                      | Ref. | 1.51            | 0.62-3.66          | 0.360          | 0.62            | 0.25-1.56          | 0.313          | 0.539                                 |
| Married                               | Ref. | 0.52            | 0.19-1.43          | 0.206          | 1.02            | 0.34-3.06          | 0.974          | 0.574                                 |
| Neck injury                           | Ref. | 7.51            | 0.74-75.67         | 0.087          | 7.98            | 0.67-94.35         | 0.100          | <b>0.013</b>                          |
| Work years ≥5 yrs                     | Ref. | 1.15            | 0.42-8.30          | 0.783          | 2.67            | 0.87-8.19          | 0.087          | 0.140                                 |
| Cold office temperature               | Ref. | 2.02            | 0.49-8.30          | 0.332          | 1.12            | 0.21-5.86          | 0.898          | 0.791                                 |
| Computer displayer not in front       | Ref. | 0.66            | 0.30-1.47          | 0.311          | 1.43            | 0.60-3.39          | 0.416          | 0.281                                 |
| Computer use ≥8 h/d                   | Ref. | 1.24            | 0.59-2.60          | 0.573          | 0.53            | 0.22-1.30          | 0.168          | 0.078                                 |
| <i>Female*:</i>                       |      |                 |                    |                |                 |                    |                |                                       |
| Age (yrs)                             | Ref. | 0.94            | 0.86-1.02          | 0.112          | 1.03            | 0.95-1.11          | 0.509          | 0.150                                 |
| BMI <sup>†</sup> (kg/m <sup>2</sup> ) | Ref. | 1.01            | 0.90-1.13          | 0.889          | 1.03            | 0.91-1.16          | 0.673          | 0.420                                 |
| Bachelor or more                      | Ref. | 0.66            | 0.31-1.43          | 0.295          | 0.58            | 0.27-1.26          | 0.169          | 0.365                                 |
| Married                               | Ref. | 0.81            | 0.34-1.97          | 0.645          | 1.41            | 0.58-3.44          | 0.447          | 0.168                                 |
| Work years ≥5 yrs                     | Ref. | <b>2.71</b>     | <b>1.05-6.96</b>   | <b>0.039</b>   | 1.52            | 0.59-3.93          | 0.385          | 0.378                                 |
| Cold office temperature               | Ref. | 0.79            | 0.28-2.24          | 0.653          | 2.06            | 0.80-5.31          | 0.135          | <b>0.010</b>                          |
| Computer displayer not in front       | Ref. | <b>2.59</b>     | <b>1.26-5.34</b>   | <b>0.010</b>   | <b>2.94</b>     | <b>1.41-6.11</b>   | <b>0.004</b>   | <b>0.001</b>                          |
| Computer use ≥8 h/d                   | Ref. | 1.39            | 0.70-2.66          | 0.356          | 1.36            | 0.70-2.67          | 0.367          | 0.714                                 |

# Northwick Park Neck Pain Questionnaire. \* The variable of neck injury was excluded from the female regression model because there were no participants in the low NPQ tertile. † OR, odds ratio; CI, confidence interval; BMI, body mass index. ‡ The *p* values for trend were obtained from multiple linear regression models.

Table 3 Multinomial logistic regression models for correlates of low back pain

| Variables/ODI <sup>#</sup>            | Low  | Medium          |                    |                | High            |                    |                | <i>p</i> value for trend <sup>‡</sup> |
|---------------------------------------|------|-----------------|--------------------|----------------|-----------------|--------------------|----------------|---------------------------------------|
|                                       |      | OR <sup>†</sup> | 95%CI <sup>†</sup> | <i>p</i> value | OR <sup>†</sup> | 95%CI <sup>†</sup> | <i>p</i> value |                                       |
| <i>Total participants:</i>            |      |                 |                    |                |                 |                    |                |                                       |
| Age (yrs)                             | Ref. | 0.95            | 0.90-1.00          | 0.067          | 1.01            | 0.96-1.06          | 0.848          | 0.740                                 |
| BMI <sup>†</sup> (kg/m <sup>2</sup> ) | Ref. | 1.04            | 0.95-1.14          | 0.377          | 1.01            | 0.92-1.10          | 0.858          | 0.269                                 |
| Male                                  | Ref. | 0.72            | 0.42-1.25          | 0.239          | 0.59            | 0.34-1.04          | 0.066          | 0.241                                 |
| Bachelor or more                      | Ref. | 0.77            | 0.44-1.35          | 0.362          | 0.64            | 0.37-1.12          | 0.122          | 0.626                                 |
| Married                               | Ref. | 1.65            | 0.86-3.16          | 0.129          | <b>2.08</b>     | <b>1.06-4.08</b>   | <b>0.034</b>   | <b>0.000</b>                          |
| Low back injury                       | Ref. | 2.12            | 0.73-6.20          | 0.169          | <b>4.36</b>     | <b>1.65-11.71</b>  | <b>0.003</b>   | <b>0.000</b>                          |
| Work years ≥5 yrs                     | Ref. | 1.21            | 0.63-2.35          | 0.568          | 1.06            | 0.53-2.11          | 0.871          | 0.264                                 |
| Cold office temperature               | Ref. | <b>2.43</b>     | <b>1.02-5.79</b>   | <b>0.045</b>   | <b>4.17</b>     | <b>1.82-9.57</b>   | <b>0.001</b>   | <b>0.000</b>                          |
| Computer displayer not in front       | Ref. | 1.05            | 0.62-1.77          | 0.867          | <b>2.05</b>     | <b>1.22-3.44</b>   | <b>0.007</b>   | <b>0.005</b>                          |
| Computer use ≥8 h/d                   | Ref. | 1.23            | 0.75-2.02          | 0.409          | 1.04            | 0.63-1.73          | 0.879          | 0.312                                 |
| <i>Male:</i>                          |      |                 |                    |                |                 |                    |                |                                       |
| Age (yrs)                             | Ref. | <b>0.91</b>     | <b>0.84-1.00</b>   | <b>0.045</b>   | 0.98            | 0.91-1.05          | 0.542          | 0.838                                 |
| BMI <sup>†</sup> (kg/m <sup>2</sup> ) | Ref. | 1.07            | 0.92-1.24          | 0.373          | 0.98            | 0.86-1.12          | 0.797          | 0.450                                 |
| Bachelor or more                      | Ref. | 0.63            | 0.25-1.59          | 0.326          | <b>0.39</b>     | <b>0.16-0.93</b>   | <b>0.034</b>   | 0.092                                 |
| Married                               | Ref. | 0.91            | 0.32-2.63          | 0.863          | 1.30            | 0.44-3.84          | 0.633          | 0.144                                 |
| Low back injury                       | Ref. | <b>7.24</b>     | <b>1.30-40.20</b>  | <b>0.024</b>   | <b>5.78</b>     | <b>1.07-31.07</b>  | <b>0.041</b>   | 0.053                                 |
| Work years ≥5 yrs                     | Ref. | 2.74            | 0.95-7.86          | 0.062          | 2.33            | 0.78-7.00          | 0.132          | 0.203                                 |
| Cold office temperature               | Ref. | 1.45            | 0.33-6.50          | 0.624          | 2.14            | 0.53-8.65          | 0.286          | 0.629                                 |
| Computer displayer not in front       | Ref. | 0.44            | 0.18-1.09          | 0.077          | 1.29            | 0.57-2.92          | 0.541          | 0.144                                 |
| Computer use ≥8 h/d                   | Ref. | 1.41            | 0.64-3.13          | 0.394          | 0.71            | 0.31-1.64          | 0.425          | 0.180                                 |
| <i>Female:</i>                        |      |                 |                    |                |                 |                    |                |                                       |
| Age (yrs)                             | Ref. | 0.98            | 0.91-1.05          | 0.501          | 1.03            | 0.96-1.10          | 0.438          | 0.574                                 |
| BMI <sup>†</sup> (kg/m <sup>2</sup> ) | Ref. | 1.03            | 0.92-1.15          | 0.669          | 1.03            | 0.91-1.16          | 0.626          | 0.476                                 |
| Bachelor or more                      | Ref. | 0.82            | 0.39-1.72          | 0.601          | 0.79            | 0.37-1.68          | 0.540          | 0.737                                 |
| Married                               | Ref. | <b>3.31</b>     | <b>1.34-8.16</b>   | <b>0.009</b>   | <b>3.50</b>     | <b>1.39-8.81</b>   | <b>0.008</b>   | <b>0.001</b>                          |
| Low back injury                       | Ref. | 0.92            | 0.19-4.60          | 0.921          | <b>4.21</b>     | <b>1.18-15.04</b>  | <b>0.027</b>   | <b>0.002</b>                          |
| Work years ≥5 yrs                     | Ref. | 0.61            | 0.24-1.54          | 0.292          | 0.57            | 0.22-1.46          | 0.240          | 0.594                                 |
| Cold office temperature               | Ref. | 2.88            | 0.92-8.98          | 0.069          | <b>5.35</b>     | <b>1.79-16.03</b>  | <b>0.003</b>   | <b>0.000</b>                          |
| Computer displayer not in front       | Ref. | 1.93            | 0.96-3.90          | 0.067          | <b>3.22</b>     | <b>1.58-6.54</b>   | <b>0.001</b>   | <b>0.016</b>                          |
| Computer use ≥8 h/d                   | Ref. | 1.08            | 0.56-2.09          | 0.816          | 1.13            | 0.57-2.23          | 0.732          | 0.499                                 |

<sup>#</sup> Oswestry low back pain disability index. <sup>†</sup> OR, odds ratio; CI, confidence interval; BMI, body mass index. <sup>‡</sup> The *p* values for trend were obtained from multiple linear regression models.

STROBE 2007 (v4) Statement—Checklist of items that should be included in reports of *cross-sectional studies*

| Section/Topic                | Item # | Recommendation                                                                                                                                                                       | Reported on page # |
|------------------------------|--------|--------------------------------------------------------------------------------------------------------------------------------------------------------------------------------------|--------------------|
| Title and abstract           | 1      | (a) Indicate the study's design with a commonly used term in the title or the abstract                                                                                               | 2                  |
|                              |        | (b) Provide in the abstract an informative and balanced summary of what was done and what was found                                                                                  | 2                  |
| <b>Introduction</b>          |        |                                                                                                                                                                                      |                    |
| Background/rationale         | 2      | Explain the scientific background and rationale for the investigation being reported                                                                                                 | 4                  |
| Objectives                   | 3      | State specific objectives, including any prespecified hypotheses                                                                                                                     | 4                  |
| <b>Methods</b>               |        |                                                                                                                                                                                      |                    |
| Study design                 | 4      | Present key elements of study design early in the paper                                                                                                                              | 5                  |
| Setting                      | 5      | Describe the setting, locations, and relevant dates, including periods of recruitment, exposure, follow-up, and data collection                                                      | 5                  |
| Participants                 | 6      | (a) Give the eligibility criteria, and the sources and methods of selection of participants                                                                                          | 5                  |
| Variables                    | 7      | Clearly define all outcomes, exposures, predictors, potential confounders, and effect modifiers. Give diagnostic criteria, if applicable                                             | 5                  |
| Data sources/<br>measurement | 8*     | For each variable of interest, give sources of data and details of methods of assessment (measurement). Describe comparability of assessment methods if there is more than one group | 5                  |
| Bias                         | 9      | Describe any efforts to address potential sources of bias                                                                                                                            | 5-6                |
| Study size                   | 10     | Explain how the study size was arrived at                                                                                                                                            | 5                  |
| Quantitative variables       | 11     | Explain how quantitative variables were handled in the analyses. If applicable, describe which groupings were chosen and why                                                         | 5                  |
| Statistical methods          | 12     | (a) Describe all statistical methods, including those used to control for confounding                                                                                                | 5-6                |
|                              |        | (b) Describe any methods used to examine subgroups and interactions                                                                                                                  | 5-6                |
|                              |        | (c) Explain how missing data were addressed                                                                                                                                          | 5-6                |
|                              |        | (d) If applicable, describe analytical methods taking account of sampling strategy                                                                                                   | 5-6                |
|                              |        | (e) Describe any sensitivity analyses                                                                                                                                                | 5-6                |
| <b>Results</b>               |        |                                                                                                                                                                                      |                    |



|                          |     |                                                                                                                                                                                                              |      |
|--------------------------|-----|--------------------------------------------------------------------------------------------------------------------------------------------------------------------------------------------------------------|------|
| Participants             | 13* | (a) Report numbers of individuals at each stage of study—eg numbers potentially eligible, examined for eligibility, confirmed eligible, included in the study, completing follow-up, and analysed            | 6    |
|                          |     | (b) Give reasons for non-participation at each stage                                                                                                                                                         | 5    |
|                          |     | (c) Consider use of a flow diagram                                                                                                                                                                           | ns   |
| Descriptive data         | 14* | (a) Give characteristics of study participants (eg demographic, clinical, social) and information on exposures and potential confounders                                                                     | 6-7  |
|                          |     | (b) Indicate number of participants with missing data for each variable of interest                                                                                                                          | 5    |
| Outcome data             | 15* | Report numbers of outcome events or summary measures                                                                                                                                                         | 6    |
| Main results             | 16  | (a) Give unadjusted estimates and, if applicable, confounder-adjusted estimates and their precision (eg, 95% confidence interval). Make clear which confounders were adjusted for and why they were included | 7-11 |
|                          |     | (b) Report category boundaries when continuous variables were categorized                                                                                                                                    | 5    |
|                          |     | (c) If relevant, consider translating estimates of relative risk into absolute risk for a meaningful time period                                                                                             | ns   |
| Other analyses           | 17  | Report other analyses done—eg analyses of subgroups and interactions, and sensitivity analyses                                                                                                               | 10   |
| <b>Discussion</b>        |     |                                                                                                                                                                                                              |      |
| Key results              | 18  | Summarise key results with reference to study objectives                                                                                                                                                     | 11   |
| Limitations              | 19  | Discuss limitations of the study, taking into account sources of potential bias or imprecision. Discuss both direction and magnitude of any potential bias                                                   | 13   |
| Interpretation           | 20  | Give a cautious overall interpretation of results considering objectives, limitations, multiplicity of analyses, results from similar studies, and other relevant evidence                                   | 11   |
| Generalisability         | 21  | Discuss the generalisability (external validity) of the study results                                                                                                                                        | 13   |
| <b>Other information</b> |     |                                                                                                                                                                                                              |      |
| Funding                  | 22  | Give the source of funding and the role of the funders for the present study and, if applicable, for the original study on which the present article is based                                                | 14   |

\*Give information separately for cases and controls in case-control studies and, if applicable, for exposed and unexposed groups in cohort and cross-sectional studies.

**Note:** An Explanation and Elaboration article discusses each checklist item and gives methodological background and published examples of transparent reporting. The STROBE checklist is best used in conjunction with this article (freely available on the Web sites of PLoS Medicine at <http://www.plosmedicine.org/>, Annals of Internal Medicine at <http://www.annals.org/>, and Epidemiology at <http://www.epidem.com/>). Information on the STROBE Initiative is available at [www.strobe-statement.org](http://www.strobe-statement.org).
